# Supplementary material for: The G119S Acetylcholinesterase (Ace-1) Target Site Mutation Confers Carbamate Resistance in the Major Malaria Vector <em>Anopheles gambiae</em> from Cameroon: A Challenge for the Coming IRS Implementation
Source: Preprints.org preprint supplement (doi:10.20944/preprints201909.0012.v1), 2019-09-01
Supplement: Supplementary file 1 [file supplementary]

**Additional file 1:** Alignment of *Ace-1* sequences from direct sequencing of field collected adults mosquitoes (F0) and of dead and alive mosquitoes 24h after exposure to bendiocarb and from F0 mosquitoes. These sequences were compared with two others collected from NCBI database and described from resistant mosquitoes from Ghana and Togo in West Africa.

|                | 10         | 20         | 30         | 40         | 50         |
|----------------|------------|------------|------------|------------|------------|
|                | .... ....  | .... ....  | .... ....  | .... ....  | .... ....  |
| KM875636_TOGO) | AACGCACTTT | ACCCCCACGC | ACACGCACCG | GCAGACGCGA | ACGACAACGA |
| KP165343_GHANA | AACGCACTTT | ACCCCCACGC | ACACGCACCG | GCAGACGCGA | ACGACAACGA |
| Alive_1        | AACGCACTTT | ACCCCCACGC | ACACGCACCG | GCAGACGCGA | ACGACAACGA |
| Alive_2        | AACGCACTTT | ACCCCCACGC | ACACGCACCG | GCAGACGCGA | ACGACAACGA |
| Alive_3        | AACGCACTTT | ACCCCCACGC | ACACGCACCG | GCAGACGCGA | ACGACAACGA |
| Alive_4        | AACGCACTTT | ACCCCCACGC | ACACGCACCG | GCAGACGCGA | ACGACAACGA |
| Alive_5        | AACGCACTTT | ACCCCCACGC | ACACGCACCG | GCAGACGCGA | ACGACAACGA |
| Alive_6        | AACGCACTTT | ACCCCCACRC | ACACGCACCG | GCAGACGCGA | ACGACAACGA |
| Alive_7        | AACGCACTTT | ACCCCCACGC | ACACGCACCG | GCAGACGCGA | ACGACAAYGA |
| Alive_8        | AACGCACTTT | ACMCCCACGC | ACACGCACCG | GCAGACGCGA | ACGACAACGA |
| Dead_1         | AACGCACTTT | ACCCCCACGC | ACACGCACCG | GCAGACGCGA | ACGACAACGA |
| Dead_2         | AACGCACTTT | ACCCCCACGC | ACACGCACCG | GCAGACGCGA | ACGACAACGA |
| Dead_3         | AACGCACTTT | ACCCCCACGC | ACACGCACCG | GCAGACGCGA | ACGACAACGA |
| Dead_4         | AACGCACTTT | ACCCCCACGC | ACACGCACCG | GCAGACGCGA | ACGACAACGA |
| Dead_5         | AACGCACTTT | ACCCCCACGC | ACACGCACCG | GCAGACGCGA | ACGACAACGA |
| Dead_6         | AACGCACTTT | ACCCCCACGC | ACACGCACCG | GCAGACGCGA | ACGACAACGA |
| Dead_7         | AACGCACTTT | ACCCCCACGC | ACACGCACCG | GCAGACGCGA | ACGACAACGA |
| Dead_8         | AACGCACTTT | ACCCCCACGC | ACACGCACCG | GCAGACGCGA | ACGACAACGA |
| Fo_1           | AACGCACTTT | ACCCCCACGC | ACACGCACCG | GCAGACGCGA | ACGACAACGA |
| Fo_2           | AACGCACTTT | ACCCCCACGC | ACACGCACCG | GCAGACGCGA | ACGACAACGA |
| Fo_3           | AACGCACTTT | ACCCCCACGC | ACACGCACCG | GCAGACGCGA | ACGACAACGA |
| Fo_4           | AACGCACTTT | ACCCCCACGC | ACACGCACCG | GCAGACGCGA | ACGACAACGA |
| Fo_5           | AACGCACTTT | ACMCCCACGC | ACACGCACCG | GCAGACGCGA | ACGACAACGA |
| Fo_6           | AACGCACTTT | ACCCCCACGC | ACACGCACCG | GCAGACGCGA | ACGACAACGA |
| Fo_7           | AACGCACTTT | ACCCCCACGC | ACACGCACCG | GCAGACGCGA | ACGACAACGA |
| Fo_8           | AACGCACTTT | ACCCCCACGC | ACACGCACCG | GCAGACGCGA | ACGACAACGA |
| Fo_9           | AACGCACTTT | ACCCCCACGC | ACACGCACCG | GCAGACGCGA | ACGACAACGA |
| Fo_10          | AACGCACTTT | ACCCCCACGC | ACACGCACCG | GCAGACGCGA | ACGACAACGA |
| Fo_11          | AACGCACTTT | ACCCCCACGC | ACACGCACCG | GCAGACGCGA | ACGACAACGA |
| Fo_12          | AAYGCACTTT | ACCCCCACGC | ACACGCACCG | GCAGACGCGA | ACGACAACGA |
|                | 60         | 70         | 80         | 90         | 100        |
|                | .... ....  | .... ....  | .... ....  | .... ....  | .... ....  |
| KM875636_TOGO) | TCCGCTGGTG | GTCAACACGG | ATAAGGGGCG | CATCCGCGGC | ATTACGGTCG |
| KP165343_GHANA | TCCGCTGGTG | GTCAACACGG | ATAAGGGGCG | CATCCGCGGC | ATTACGGTCG |
| Alive_1        | TCCGCTGGTG | GTCAACACGG | ATAAGGGGCG | CATCCGCGGC | ATTACGGTCG |
| Alive_2        | TCCGCTGGTG | GTCAACACGG | ATAAGGGGCG | CATCCGCGGC | ATTACGGTCG |
| Alive_3        | TCCGCTGGTG | GTCAACACGG | ATAAGGGGCG | CATCCGCGGC | ATTACGGTCG |
| Alive_4        | TCCGCTGGTG | GTCAACACGG | ATAAGGGGCG | CATCCGCGGC | ATTACGGTCG |
| Alive_5        | TCCGCTGGTG | GTCAACACGG | ATAAGGGGCG | CATCCGCGGC | ATTACGGTCG |
| Alive_6        | TCCGCTGGTG | GTCAACACGG | ATAAGGGGCG | CATCCGCGGC | ATTACGGTCG |
| Alive_7        | TCCGCTGGTG | GTCAACACGG | ATAAGGGGCG | CATCCGCGGC | ATTACGGTCG |
| Alive_8        | TCCGCTGGTG | GTCAACACGG | ATAAGGGGCG | CATCCGCGGC | ATTACGGTCG |
| Dead_1         | TCCGCTGGTG | GTCAACACGG | ATAAGGGGCG | CATCCGCGGC | ATTACGGTCG |
| Dead_2         | TCCGCTGGTG | GTCAACACGG | ATAAGGGGCG | CATCCGCGGC | ATTACGGTCG |
| Dead_3         | TCCGCTGGTG | GTCAACACGG | ATAAGGGGCG | CATCCGCGGC | ATTACGGTCG |
| Dead_4         | TCCGCTGGTG | GTCAACACGG | ATAAGGGGCG | CATCCGCGGC | ATTACGGTCG |
| Dead_5         | TCCGCTGGTG | GTCAACACGG | ATAAGGGGCG | CATCCGCGGC | ATTACGGTCG |
| Dead_6         | TCCGCTGGTG | GTCAACACGG | ATAAGGGGCG | CATCCGCGGC | ATTACGGTCG |
| Dead_7         | TCCGCTGGTG | GTCAACACGG | ATAAGGGGCG | CATCCGCGGC | ATTACGGTCG |
| Dead_8         | TCCGCTGGTG | GTCAACACGG | ATAAGGGGCG | CATCCGCGGC | ATTACGGTCG |
| Fo_1           | TCCGCTGGTG | GTCAACACGG | ATAAGGGGCG | CATCCGCGGC | ATTACGGTCG |
| Fo_2           | TCCGCTGGTG | GTCAACACGG | ATAAGGGGCG | CATCCGCGGC | ATTACGGTCG |

|       |            |            |            |            |            |
|-------|------------|------------|------------|------------|------------|
| Fo_3  | TCCGCTGGTG | GTCAACACGG | ATAAGGGGCG | CATCCGCGGC | ATTACGGTCG |
| Fo_4  | TCCGCTGGTG | GTCAACACGG | ATAAGGGGCG | CATCCGCGGC | ATTACGGTCG |
| Fo_5  | TCCGCTGGTG | GTCAACACGG | ATAAGGGGCG | CATCCGCGGC | ATTACGGTCG |
| Fo_6  | TCCGCTGGTG | GTCAACACGG | ATAAGGGGCG | CATCCGCGGC | ATTACGGTCG |
| Fo_7  | TCCGCTGGTG | GTCAACACGG | ATAAGGGGCG | CATCCGCGGC | ATTACGGTCG |
| Fo_8  | TCCGCTGGTG | GTCAACACGG | ATAAGGGGCG | CATCCGCGGC | ATTACGGTCG |
| Fo_9  | TCCGCTGGTG | GTCAACACGG | ATAAGGGGCG | CATCCGCGGC | ATTACGGTCG |
| Fo_10 | TCCGCTGGTG | GTCAACACGG | ATAAGGGGCG | CATCCGCGGC | ATTACGGTCG |
| Fo_11 | TCCGCTGGTG | GTCAACACGG | ATAAGGGGCG | CATCCGCGGC | ATTACGGTCG |
| Fo_12 | TCCGCTGGTG | GTCAACACGG | ATAAGGGGCG | CATCCGCGGC | ATTACGGTCG |

|                | 110       | 120        | 130        | 140        | 150        |
|----------------|-----------|------------|------------|------------|------------|
|                | .... .... | .... ....  | .... ....  | .... ....  | .... ....  |
| KM875636_TOGO) | ATGCGCCAG | CGGCAAGAAG | GTGGACGTGT | GGCTCGGCAT | TCCCTACGCC |
| KP165343_GHANA | ATGCGCCAG | CGGCAAGAAG | GTGGACGTGT | GGCTCGGCAT | TCCCTACGCC |
| Alive_1        | ATGCGCCAG | CGGCAAGAAG | GTGGACGTGT | GGCTCGGCAT | TCCCTACGCC |
| Alive_2        | ATGCGCCAG | CGGCAAGAAG | GTGGACGTGT | GGCTCGGCAT | TCCCTACGCS |
| Alive_3        | ATGCGCCAG | CGGCAAGAAG | GTGGACGTGT | GGCTCGGCAT | TCCCTACGCC |
| Alive_4        | ATGCGCCAG | CGGCAAGAAG | GTGGACGTGT | GGCTCGGCAT | TCCCTACGCC |
| Alive_5        | ATGCGCCAG | CGGCAAGAAG | GTGGACGTGT | GGCTCGGCAT | TCCCTACGCC |
| Alive_6        | ATGCGCCAG | CGGCAAGAAG | GTGGACGTGT | GGCTCGGCAT | TCCCTACGCS |
| Alive_7        | ATGCGCCAG | CGGCAAGAAG | GTGGACGTGT | GGCTCGGCAT | TCCCTACGCC |
| Alive_8        | ATGCGCCAG | CGGCAAGAAG | GTGGACGTGT | GGCTCGGCAT | TCCCTACGCC |
| Dead_1         | ATGCGCCAG | CGGCAAGAAG | GTGGACGTGT | GGCTCGGCAT | TCCCTACGCS |
| Dead_2         | ATGCGCCAG | CGGCAAGAAG | GTGGACGTGT | GGCTCGGCAT | TCCCTACGCS |
| Dead_3         | ATGCGCCAG | CGGCAAGAAG | GTGGACGTGT | GGCTCGGCAT | TCCCTACGCC |
| Dead_4         | ATGCGCCAG | CGGCAAGAAG | GTGGACGTGT | GGCTCGGCAT | TCCCTACGCG |
| Dead_5         | ATGCGCCAG | CGGCAAGAAG | GTGGACGTGT | GGCTCGGCAT | TCCCTACGCG |
| Dead_6         | ATGCGCCAG | CGGCAAGAAG | GTGGACGTGT | GGCTCGGCAT | TCCCTACGCS |
| Dead_7         | ATGCGCCAG | CGGCAAGAAG | GTGGACGTGT | GGCTCGGCAT | TCCCTACGCG |
| Dead_8         | ATGCGCCAG | CGGCAAGAAG | GTGGACGTGT | GGCTCGGCAT | TCCCTACGCC |
| Fo_1           | ATGCGCCAG | CGGCAAGAAG | GTGGACGTGT | GGCTCGGCAT | TCCCTACGCC |
| Fo_2           | ATGCGCCAG | CGGCAAGAAG | GTGGACGTGT | GGCTCGGCAT | TCCCTACGCC |
| Fo_3           | ATGCGCCAG | CGGCAAGAAG | GTGGACGTGT | GGCTCGGCAT | TCCCTACGCC |
| Fo_4           | ATGCGCCAG | CGGCAAGAAG | GTGGACGTGT | GGCTCGGCAT | TCCCTACGCC |
| Fo_5           | ATGCGCCAG | CGGCAAGAAG | GTGGACGTGT | GGCTCGGCAT | TCCCTACGCS |
| Fo_6           | ATGCGCCAG | CGGCAAGAAG | GTGGACGTGT | GGCTCGGCAT | TCCCTACGCC |
| Fo_7           | ATGCGCCAG | CGGCAAGAAG | GTGGACGTGT | GGCTCGGSAT | TCCCTACGCS |
| Fo_8           | ATGCGCCAG | CGGCAAGAAG | GTGGACGTGT | GGCTCGGCAT | TCCCTACGCG |
| Fo_9           | ATGCGCCAG | CGGCAAGAAG | GTGGACGTGT | GGCTCGGCAT | TCCCTACGCC |
| Fo_10          | ATGCGCCAG | CGGCAAGAAG | GTGGACGTGT | GGCTCGGCAT | TCCCTACGCC |
| Fo_11          | ATGCGCCAG | CGGCAAGAAG | GTGGACGTGT | GGCTCGGCAT | TCCCTACGCS |
| Fo_12          | ATGCGCCAG | CGGCAAGAAG | GTGGACGTGT | GGCTCGGCAT | TCCCTACGCC |

|                | 160        | 170        | 180        | 190        | 200        |
|----------------|------------|------------|------------|------------|------------|
|                | .... ....  | .... ....  | .... ....  | .... ....  | .... ....  |
| KM875636_TOGO) | CAGCCGCCGG | TCGGGCCGCT | ACGGTTCCGT | CATCCGCGGC | CGGCCGAAAA |
| KP165343_GHANA | CAGCCGCCGG | TCGGGCCGCT | ACGGTTCCGT | CATCCGCGGC | CGGCCGAAAA |
| Alive_1        | CAGCKCCGG  | TCGGGCCGCT | ACGGTTCCGT | CATCCGCGGC | CGGCCGAAAA |
| Alive_2        | CAGCCGCCGG | TCGGGCCGCT | ACGGTTCCGT | CATCCGCGGC | CGGCCGAAAA |
| Alive_3        | CAGCCGCCGG | TCGGGCCGCT | ACGGTTCCGT | CATCCGCGGC | CGGCCGAAAA |
| Alive_4        | CAGCCGCCGG | TCGGGCCGCT | ACGGTTCCGT | CATCCGCGGC | CGGCCGAAAA |
| Alive_5        | CAGCCGCCGG | TCGGGCCGCT | ACGGTTCCGT | CATCCGCGGC | CGGCCGAAAA |
| Alive_6        | CAGCCGCCGG | TCGGGCCGCT | ACGGTTCCGT | CATCCGCGGC | CGGCCGAAAA |
| Alive_7        | CAGCCGCCGG | TCGGGCCGCT | ACGGTTCCGT | CATCCGCGGC | CGGCCGAAAA |
| Alive_8        | CAGCKCCGG  | TCGGGCCGCT | ACGGTTCCGT | CATCCGCGGC | CGGCCGAAAA |
| Dead_1         | CAGCCGCCGG | TCGGGCCGCT | ACGGTTCCGT | CATCCGCGGC | CGGCCGAAAA |
| Dead_2         | CAGCCGCCGG | TCGGGCCGCT | ACGGTTCCGT | CATCCGCGGC | CGGCCGAAAA |
| Dead_3         | CAGCCGCCGG | TCGGGCCGCT | ACGGTTCCGT | CATCCGCGGC | CGGCCGAAAA |
| Dead_4         | CAGCCGCCGG | TCGGGCCGCT | ACGGTTCCGT | CATCCGCGGC | CGGCCGAAAA |
| Dead_5         | CAGCCGCCGG | TCGGGCCGCT | ACGGTTCCGT | CATCCGCGGC | CGGCCGAAAA |
| Dead_6         | CAGCCGCCGG | TCGGGCCGCT | ACGGTTCCGT | CATCCGCGGC | CGGCCGAAAA |

|        |            |            |            |            |            |
|--------|------------|------------|------------|------------|------------|
| Dead_7 | CAGCCGCCGG | TCGGGCCGCT | ACGGTTCCGT | CATCCGCGGC | CGGCCGAAAA |
| Dead_8 | CAGCCGCCGG | TCGGGCCGCT | ACGGTTCCGT | CATCCGCGGC | CGGCCGAAAA |
| Fo_1   | CAGCCGCCGG | TCGGGCCGCT | ACGGTTCCGT | CATCCGCGGC | CGGCCGAAAA |
| Fo_2   | CAGCCGCCGG | TCGGGCCGCT | ACGGTTCCGT | CATCCGCGGC | CGGCCGAAAA |
| Fo_3   | CAGCCGCCGG | TCGGGCCGCT | ACGGTTCCGT | CATCCGCGGC | CGGCCGAAAA |
| Fo_4   | CAGCCGCCGG | TCGGGCCGCT | ACGGTTCCGT | CATCCGCGGC | CGGCCGAAAA |
| Fo_5   | CAGCCGCCGG | TCGGGCCGCT | ACGGTTCCGT | CATCCGCGGC | CGGCCGAAAA |
| Fo_6   | CAGCCGCCGG | TCGGGCCGCT | ACGGTTCCGT | CATCCGCGGC | CGGCCGAAAA |
| Fo_7   | CAGCCGCCGG | TCGGGCCGCT | ACGGTTCCGT | CATCCGCGGC | CGGCCGAAAA |
| Fo_8   | CAGCCGCCGG | TCGGGCCGCT | ACGGTTCCGT | CATCCGCGGC | CGGCCGAAAA |
| Fo_9   | CAGCCGCCGG | TCGGGCCGCT | ACGGTTCCGT | CATCCGCGGC | CGGCCGAAAA |
| Fo_10  | CAGCCGCCGG | TCGGGCCGCT | ACGGTTCCGT | CATCCGCGGC | CGGCCGAAAA |
| Fo_11  | CAGCCGCCGG | TCGGGCCGCT | ACGGTTCCGT | CATCCGCGGC | CGGCCGAAAA |
| Fo_12  | CAGCCGCCGG | TCGGGCCGCT | ACGGTTCCGT | CATCCGCGGC | CGGCCGAAAA |

|                |            |            |            |            |            |
|----------------|------------|------------|------------|------------|------------|
|                | 210        | 220        | 230        | 240        | 250        |
|                | .... ....  | .... ....  | .... ....  | .... ....  | .... ....  |
| KM875636_TOGO) | GTGGACCGGC | GTGCTGAACA | CGACCACACC | GCCCAACAGC | TGCGTGCAGA |
| KP165343_GHANA | GTGGACCGGC | GTGCTGAACA | CGACCACACC | GCCCAACAGC | TGCGTGCAGA |
| Alive_1        | GTGGACCGGC | GTGCTGAACA | CGACCACACC | GCCCAACAGC | TGCGTGCAGA |
| Alive_2        | GTGGACCGGC | GTGCTGAACA | CGACCACACC | GCCCAACAGC | TGCGTGCAGA |
| Alive_3        | GTGGACCGGC | GTGCTGAACA | CGACCACACC | GCCCAACAGC | TGCGTGCAGA |
| Alive_4        | GTGGACCGGC | GTGCTGAACA | CGACCACACC | GCCCAACAGC | TGCGTGCAGA |
| Alive_5        | GTGGACCGGC | GTGCTGAACA | CGACCACACC | GCCCAACAGC | TGCGTGCAGA |
| Alive_6        | GTGGACCGGC | GTGCTGAACA | CGACCACACC | GCCCAACAGC | TGCGTGCAGA |
| Alive_7        | GTGGACCGGC | GTGCTGAACA | CGACCACACC | GCCCAACAGC | TGCGTGCAGA |
| Alive_8        | GTGGACCGGC | GTGCTGAACA | CGACCACACC | GCCCAACAGC | TGCGTGCAGA |
| Dead_1         | GTGGACCGGC | GTGCTGAACA | CGACCACACC | GCCCAACAGC | TGCGTGCAGA |
| Dead_2         | GTGGACCGGC | GTGCTGAACA | CGACCACACC | GCCCAACAGC | TGCGTGCAGA |
| Dead_3         | GTGGACCGGC | GTGCTGAACA | CGACCACACC | GCCCAACAGC | TGCGTGCAGA |
| Dead_4         | GTGGACCGGC | GTGCTGAACA | CGACCACACC | GCCCAACAGC | TGCGTGCAGA |
| Dead_5         | GTGGACCGGC | GTGCTGAACA | CGACCACACC | GCCCAACAGC | TGCGTGCAGA |
| Dead_6         | GTGGACCGGC | GTGCTGAACA | CGACCACACC | GCCCAACAGC | TGCGTGCAGA |
| Dead_7         | GTGGACCGGC | GTGCTGAACA | CGACCACACC | GCCCAACAGC | TGCGTGCAGA |
| Dead_8         | GTGGACCGGC | GTGCTGAACA | CGACCACACC | GCCCAACAGC | TGCGTGCAGA |
| Fo_1           | GTGGACCGGC | GTGCTGAACA | CGACCACACC | GCCCAACAGC | TGCGTGCAGA |
| Fo_2           | GTGGACCGGC | GTGCTGAACA | CGACCACACC | GCCCAACAGC | TGCGTGCAGA |
| Fo_3           | GTGGACCGGC | GTGCTGAACA | CGACCACACC | GCCCAACAGC | TGCGTGCAGA |
| Fo_4           | GTGGACCGGC | GTGCTGAACA | CGACCACACC | GCCCAACAGC | TGCGTGCAGA |
| Fo_5           | GTGGACCGGC | GTGCTGAACA | CGACCACACC | GCCCAACAGC | TGCGTGCAGA |
| Fo_6           | GTGGACCGGC | GTGCTGAACA | CGACCACACC | GCCCAACAGC | TGCGTGCAGA |
| Fo_7           | GTGGACCGGC | GTGCTGAACA | CGACCACACC | GCCCAACAGC | TGCGTGCAGA |
| Fo_8           | GTGGACCGGC | GTGCTGAACA | CGACCACACC | GCCCAACAGC | TGCGTGCAGA |
| Fo_9           | GTGGACCGGC | GTGCTGAACA | CGACCACACC | GCCCAACAGC | TGCGTGCAGA |
| Fo_10          | GTGGACCGGC | GTGCTGAACA | CGACCACACC | GCCMAACAGC | TGCGTGCAGA |
| Fo_11          | GTGGACCGGC | GTGCTGAACA | CGACCACACC | GCCCAACAGC | TGCGTGCAGA |
| Fo_12          | GTGGACCGGC | GTGCTGAACA | CGACCACACC | GCCCAACAGC | TGCGTGCAGA |

|                |            |            |            |            |            |
|----------------|------------|------------|------------|------------|------------|
|                | 260        | 270        | 280        | 290        | 300        |
|                | .... ....  | .... ....  | .... ....  | .... ....  | .... ....  |
| KM875636_TOGO) | TCGTGGACAC | CGTGTTCGGC | GACTTCCCGG | GCGCGACCAT | GTGGAACCCG |
| KP165343_GHANA | TCGTGGACAC | CGTGTTCGGC | GACTTCCCGG | GCGCGACCAT | GTGGAACCCG |
| Alive_1        | TCGTGGACAC | CGTGTTCGGC | GACTTCCCGG | GCGCGACCAT | GTGGAACCCG |
| Alive_2        | TCGTGGACAC | CGTGTTCGGC | GACTTCCCGG | GCGCGACCAT | GTGGAACCCG |
| Alive_3        | TCGTGGACAC | CGTGTTCGGC | GACTTCCCGG | GCGCGACCAT | GTGGAACCCG |
| Alive_4        | TCGTGGACAC | CGTGTTCGGC | GACTTCCCGG | GCGCGACCAT | GTGGAACCCG |
| Alive_5        | TCGTGGACAC | CGTGTTCGGC | GACTTCCCGG | GCGCGACCAT | GTGGAACCCG |
| Alive_6        | TCGTGGACAC | CGTGTTCGGC | GACTTCCCGG | GCGCGACCAT | GTGGAACCCG |
| Alive_7        | TCGTGGACAC | CGTGTTCGGC | GACTTCCCGG | GCGCGACCAT | GTGGAACCCG |
| Alive_8        | TCGTGGACAC | CGTGTTCGGC | GACTTCCCGG | GCGCGACCAT | GTGGAACCCG |
| Dead_1         | TCGTGGACAC | CGTGTTCGGC | GACTTCCCGG | GCGCGACCAT | GTGGAACCCG |
| Dead_2         | TCGTGGACAC | CGTGTTCGGC | GACTTCCCGG | GCGCGACCAT | GTGGAACCCG |

|        |            |             |            |            |            |
|--------|------------|-------------|------------|------------|------------|
| Dead_3 | TCGTGGACAC | CGTGTTTCGGC | GACTTCCCGG | GCGCGACCAT | GTGGAACCCG |
| Dead_4 | TCGTGGACAC | CGTGTTTCGGC | GACTTCCCGG | GCGCGACCAT | GTGGAACCCG |
| Dead_5 | TCGTGGACAC | CGTGTTTCGGC | GACTTCCCGG | GCGCGACCAT | GTGGAACCCG |
| Dead_6 | TCGTGGACAC | CGTGTTTCGGC | GACTTCCCGG | GCGCGACCAT | GTGGAACCCG |
| Dead_7 | TCGTGGACAC | CGTGTTTCGGC | GACTTCCCGG | GCGCGACCAT | GTGGAACCCG |
| Dead_8 | TCGTGGACAC | CGTGTTTCGGC | GACTTCCCGG | GCGCGACCAT | GTGGAACCCG |
| Fo_1   | TCGTGGACAC | CGTGTTTCGGC | GACTTCCCGG | GCGCGACCAT | GTGGAACCCG |
| Fo_2   | TCGTGGACAC | CGTGTTTCGGC | GACTTCCCGG | GCGCGACCAT | GTGGAACCCG |
| Fo_3   | TCGTGGACAC | CGTGTTTCGGC | GACTTCCCGG | GCGCGACCAT | GTGGAACCCG |
| Fo_4   | TCGTGGACAC | CGTGTTTCGGC | GACTTCCCGG | GCGCGACCAT | GTGGAACCCG |
| Fo_5   | TCGTGGACAC | CGTGTTTCGGC | GACTTCCCGG | GCGCGACCAT | GTGGAACCCG |
| Fo_6   | TCGTGGACAC | CGTGTTTCGGC | GACTTCCCGG | GCGCGACCAT | GTGGAACCCG |
| Fo_7   | TCGTGGACAC | CGTGTTTCGGC | GACTTCCCGG | GCGCGACCAT | GTGGAACCCG |
| Fo_8   | TCGTGGACAC | CGTGTTTCGGC | GACTTCCCGG | GCGCGACCAT | GTGGAACCCG |
| Fo_9   | TCGTGGACAC | CGTGTTTCGGC | GACTTCCCGG | GCGCGACCAT | GTGGAACCCG |
| Fo_10  | TCGTGGACAC | CGTGTTTCGGC | GACTTCCCGG | GCGCGACCAT | GTGGAACCCG |
| Fo_11  | TCGTGGACAC | CGTGTTTCGGC | GACTTCCCGG | GCGCGACCAT | GTGGAACCCG |
| Fo_12  | TCGTGGACAC | CGTGTTTCGGC | GACTTCCCGG | GCGCGACCAT | GTGGAACCCG |

|                |            |            |            |            |            |
|----------------|------------|------------|------------|------------|------------|
|                | 310        | 320        | 330        | 340        | 350        |
|                | .... ....  | .... ....  | .... ....  | .... ....  | .... ....  |
| KM875636_TOGO) | AACACGCCCC | TGTCCGAGGA | CTGTCTGTAC | ATTAACGTGG | TGGCACC CG |
| KP165343_GHANA | AACACGCCCC | TGTCCGAGGA | CTGTCTGTAC | ATTAACGTGG | TGGCACC CG |
| Alive_1        | AACACGCCCC | TGTCCGAGGA | CTGTCTGTAC | ATTAACGTGG | TGGCACC CG |
| Alive_2        | AACACGCCCC | TGTCCGAGGA | CTGTCTGTAC | ATTAACGTGG | TGGCACC CG |
| Alive_3        | AACACGCCCC | TGTCCGAGGA | CTGTCTGTAC | ATTAACGTGG | TGGCACC CG |
| Alive_4        | AACACGCCCC | TGTCCGAGGA | CTGTCTGTAC | ATTAACGTGG | TGGCACC CG |
| Alive_5        | AACACGCCCC | TGTCCGAGGA | CTGTCTGTAC | ATTAACGTGG | TGGCACC CG |
| Alive_6        | AACACGCCCC | TGTCCGAGGA | CTGTCTGTAC | ATTAACGTGG | TGGCACC CG |
| Alive_7        | AACACGCCCC | TGTCCGAGGA | CTGTCTGTAC | ATTAACGTGG | TGGCACC CG |
| Alive_8        | AACACGCCCC | TGTCCGAGGA | CTGTCTGTAC | ATTAACGTGG | TGGCACC CG |
| Dead_1         | AACACGCCCC | TGTCCGAGGA | CTGTCTGTAC | ATTAACGTGG | TGGCACC CG |
| Dead_2         | AACACGCCCC | TGTCCGAGGA | CTGTCTGTAC | ATTAACGTGG | TGGCACC CG |
| Dead_3         | AACACGCCCC | TGTCCGAGGA | CTGTCTGTAC | ATTAACGTGG | TGGCACC CG |
| Dead_4         | AACACGCCCC | TGTCCGAGGA | CTGTCTGTAC | ATTAACGTGG | TGGCACC CG |
| Dead_5         | AACACGCCCC | TGTCCGAGGA | CTGTCTGTAC | ATTAACGTGG | TGGCACC CG |
| Dead_6         | AACACGCCCC | TGTCCGAGGA | CTGTCTGTAC | ATTAACGTGG | TGGCACC CG |
| Dead_7         | AACACGCCCC | TGTCCGAGGA | CTGTCTGTAC | ATTAACGTGG | TGGCACC CG |
| Dead_8         | AACACGCCCC | TGTCCGAGGA | CTGTCTGTAC | ATTAACGTGG | TGGCACC CG |
| Fo_1           | AACACGCCCC | TGTCCGAGGA | CTGTCTGTAC | ATTAACGTGG | TGGCACC CG |
| Fo_2           | AACACGCCCC | TGTCCGAGGA | CTGTCTGTAC | ATTAACGTGG | TGGCACC CG |
| Fo_3           | AACACGCCCC | TGTCCGAGGA | CTGTCTGTAC | ATTAACGTGG | TGGCACC CG |
| Fo_4           | AACACGCCCC | TGTCCGAGGA | CTGTCTGTAC | ATTAACGTGG | TGGCACC CG |
| Fo_5           | AACACGCCCC | TSTCCGAGGA | CTGTCTGTAC | ATTAACGTGG | TGGCACC CG |
| Fo_6           | AACACGCCCC | TGTCCGAGGA | CTGTCTGTAC | ATTAACGTGG | TGGCACC CG |
| Fo_7           | AACACGCCCC | TSTCCGAGGA | CTGTCTGTAC | ATTAACGTGG | TGGCACC CG |
| Fo_8           | AACACGCCCC | TGTCCGAGGA | CTGTCTGTAC | ATTAACGTGG | TGGCACC CG |
| Fo_9           | AACACGCCCC | TGTCCGAGGA | CTGTCTGTAC | ATTAACGTGG | TGGCACC CG |
| Fo_10          | AACACGCCCC | TGTCCGAGGA | CTGTCTGTAC | ATTAACGTGG | TGGCACC CG |
| Fo_11          | AACACGCCCC | TGTCCGAGGA | CTGTCTGTAC | ATTAACGTGG | TGGCACC CG |
| Fo_12          | AACACGCCCC | TGTCCGAGGA | CTGTCTGTAC | ATTAACGTGG | TGGCACC CG |

|                |             |            |            |            |            |
|----------------|-------------|------------|------------|------------|------------|
|                | 360         | 370        | 380        | 390        | 400        |
|                | .... ....   | .... ....  | .... ....  | .... ....  | .... ....  |
| KM875636_TOGO) | GCCCCGGCCC  | AAGAATGCGG | CCGTCATGCT | GTGGATCTTC | GGCGGCAGCT |
| KP165343_GHANA | GCCCCGGCCC  | AAGAATGCGG | CCGTCATGCT | GTGGATCTTC | GGCGGCAGCT |
| Alive_1        | RCCCCGGCCC  | AAGAATGCGG | CCGTCATGCT | GTGGATCTTC | GGCGGCAGCT |
| Alive_2        | RCCCCGGCCC  | AAGAATGCGG | CCGTCATGCT | GTGGATCTTC | GGCGGCAGCT |
| Alive_3        | GCCCCGGCCC  | AAGAATGCGG | CCGTCATGCT | GTGGATCTTC | GGCGGCAGCT |
| Alive_4        | RCCCCGGCCC  | AAGAATGCGG | CCGTCATGCT | GTGGATCTTC | GGCGGCAGCT |
| Alive_5        | GCCCCGGCCC  | AAGAATGCGG | CCGTCATGCT | GTGGATCTTC | GGCGGCAGCT |
| Alive_6        | ACCCCCGGCCC | AAGAATGCGG | CCGTCATGCT | GTGGATCTTC | GGCGGCAGCT |

|         |             |            |            |            |                     |
|---------|-------------|------------|------------|------------|---------------------|
| Alive_7 | GCCCCGGCCC  | AAGAATGCGG | CCGTCATGCT | GTGGATCTTC | GGCGGC <b>R</b> GST |
| Alive_8 | RCCCCGGCCC  | AAGAATGCGG | CCGTCATGCT | GTGGATCTTC | GGCGGCGGCT          |
| Dead_1  | ACCCCCGGCCC | AAGAATGCGG | CCGTCATGCT | GTGGATCTTC | GGCGGCGGCT          |
| Dead_2  | ACCCCCGGCCC | AAGAATGCGG | CCGTCATGCT | GTGGATCTTC | GGCGGCGGCT          |
| Dead_3  | ACCCCCGGCCC | AAGAATGCGG | CCGTCATGCT | GTGGATCTTC | GGCGGCGGCT          |
| Dead_4  | ACCCCCGGCCC | AAGAATGCGG | CCGTCATGCT | GTGGATCTTC | GGCGGCGGCT          |
| Dead_5  | ACCCCCGGCCC | AAGAATGCGG | CCGTCATGCT | GTGGATCTTC | GGCGGCGGCT          |
| Dead_6  | ACCCCCGGCCC | AAGAATGCGG | CCGTCATGCT | GTGGATCTTC | GGCGGCGGCT          |
| Dead_7  | ACCCCCGGCCC | AAGAATGCGG | CCGTCATGCT | GTGGATCTTC | GGCGGCGGCT          |
| Dead_8  | ACCCCCGGCCC | AAGAATGCGG | CCGTCATGCT | GTGGATCTTC | GGCGGCGGCT          |
| Fo_1    | GCCCCGGCCC  | AAGAATGCGG | CCGTCATGCT | GTGGATCTTC | GGCGGC <b>A</b> GCT |
| Fo_2    | GCCCCGGCCC  | AAGAATGCGG | CCGTCATGCT | GTGGATCTTC | GGCGGC <b>A</b> GCT |
| Fo_3    | GCCCCGGCCC  | AAGAATGCGG | CCGTCATGCT | GTGGATCTTC | GGCGGC <b>A</b> GCT |
| Fo_4    | GCCCCGGCCC  | AAGAATGCGG | CCGTCATGCT | GTGGATCTTC | GGCGGC <b>A</b> GCT |
| Fo_5    | ACCCCCGGCCC | AAGAATGCGG | CCGTCATGCT | GTGGATCTTC | GGCGGCGGCT          |
| Fo_6    | GCCCCGGCCC  | AAGAATGCGG | CCGTCATGCT | GTGGATCTTC | GGCGGC <b>A</b> GCT |
| Fo_7    | RCCCCGGCCC  | AAGAATGCGG | CCGTCATGCT | GTGGATCTTC | GGCGGCGGCT          |
| Fo_8    | ACCCCCGGCCC | AAGAATGCGG | CCGTCATGCT | GTGGATCTTC | GGCGGCGGCT          |
| Fo_9    | GCCCCGGCCC  | AAGAATGCGG | CCGTCATGCT | GTGGATCTTC | GGCGGC <b>A</b> GCT |
| Fo_10   | RCCCCGGCCC  | AAGAATGCGG | CCGTCATGCT | GTGGATCTTC | GGCGGC <b>R</b> GCT |
| Fo_11   | RCCCCGGCCC  | AAGAATGCGG | CCGTCATGCT | GTGGATCTTC | GGCGGC <b>A</b> GCT |
| Fo_12   | GCCCCGGCCC  | AAGAATGCGG | CCGTCATGCT | GTGGATCTTC | GGCGGC <b>R</b> GCT |

|                | 410        | 420        | 430        | 440        | 450        |
|----------------|------------|------------|------------|------------|------------|
| KM875636_TOGO) | .... ....  | .... ....  | .... ....  | .... ....  | .... ....  |
| KP165343_GHANA | TCTACTCCGG | CACCGCCACC | CTGGACGTGT | ACGACCACCG | GGCGCTTGCG |
| Alive_1        | TCTACTCCGG | CACCGCCACC | CTGGACGTGT | ACGACCACCG | GGCGCTTGCG |
| Alive_2        | TCTACTCCGG | CACCGCCACC | CTGGACGTGT | ACGACCACCG | GGCGCTTGCG |
| Alive_3        | TCTACTCCGG | CACCGCCACC | CTGGACGTGT | ACGACCACCG | GGCGCTTGCG |
| Alive_4        | TCTACTCCGG | CACCGCCACC | CTGGACGTGT | ACGACCACCG | GGCGCTTGCG |
| Alive_5        | TCTACTCCGG | CACCGCCACC | CTGGACGTGT | ACGACCACCG | GGCGCTTGCG |
| Alive_6        | TCTACTCCGG | CACCGCCACC | CTGGACGTGT | ACGACCACCG | GGCGCTTGCG |
| Alive_7        | TCTACTCCGG | CACCGCCACC | CTGGACGTGT | ACGACCACCG | GGCGCTTGCG |
| Alive_8        | TCTACTCCGG | CACCGCCACC | CTGGACGTGT | ACGACCACCG | GGCGCTTGCG |
| Dead_1         | TCTACTCCGG | CACCGCCACC | CTGGACGTGT | ACGACCACCG | GGCGCTTGCG |
| Dead_2         | TCTACTCCGG | CACCGCCACC | CTGGACGTGT | ACGACCACCG | GGCGCTTGCG |
| Dead_3         | TCTACTCCGG | CACCGCCACC | CTGGACGTGT | ACGACCACCG | GGCGCTTGCG |
| Dead_4         | TCTACTCCGG | CACCGCCACC | CTGGACGTGT | ACGACCACCG | GGCGCTTGCG |
| Dead_5         | TCTACTCCGG | CACCGCCACC | CTGGACGTGT | ACGACCACCG | GGCGCTTGCG |
| Dead_6         | TCTACTCCGG | CACCGCCACC | CTGGACGTGT | ACGACCACCG | GGCGCTTGCG |
| Dead_7         | TCTACTCCGG | CACCGCCACC | CTGGACGTGT | ACGACCACCG | GGCGCTTGCG |
| Dead_8         | TCTACTCCGG | CACCGCCACC | CTGGACGTGT | ACGACCACCG | GGCGCTTGCG |
| Fo_1           | TCTACTCCGG | CACCGCCACC | CTGGACGTGT | ACGACCACCG | GGCGCTTGCG |
| Fo_2           | TCTACTCCGG | CACCGCCACC | CTGGACGTGT | ACGACCACCG | GGCGCTTGCG |
| Fo_3           | TCTACTCCGG | CACCGCCACC | CTGGACGTGT | ACGACCACCG | GGCGCTTGCG |
| Fo_4           | TCTACTCCGG | CACCGCCACC | CTGGACGTGT | ACGACCACCG | GGCGCTTGCG |
| Fo_5           | TCTACTCCGG | CACCGCCACC | CTGGACGTGT | ACGACCACCG | GGCGCTTGCR |
| Fo_6           | TCTACTCCGG | CACCGCCACC | CTGGACGTGT | ACGACCACCG | GGCGCTTGCG |
| Fo_7           | TCTACTCCGG | CACCGCCACC | CTGGACGTGT | ACGACCACCG | GGCGCTTGCG |
| Fo_8           | TCTACTCCGG | CACCGCCACC | CTGGACGTGT | ACGACCACCG | GGCGCTTGCG |
| Fo_9           | TCTACTCCGG | CACCGCCACC | CTGGACGTGT | ACGACCACCG | GGCGCTTGCG |
| Fo_10          | TCTACTCCGG | CACCGCCACC | CTGGACGTGT | ACGACCACCG | GGCGCTTGCG |
| Fo_11          | TCTACTCCGG | CACCGCCACC | CTGGACGTGT | ACGACCACCG | GGCGCTTGCG |
| Fo_12          | TCTACTCCGG | CACCGCCACC | CTGGACGTGT | ACGACCACCG | GGCGCTTGCG |

|                | 460        | 470        | 480        | 490        | 500        |
|----------------|------------|------------|------------|------------|------------|
| KM875636_TOGO) | .... ....  | .... ....  | .... ....  | .... ....  | .... ....  |
| KP165343_GHANA | TCGGAGGAGA | ACGTGATCGT | GGTGTCGCTG | CAGTACCGCG | TGGCCAGTCT |
| Alive_1        | TCGGAGGAGA | ACGTGATCGT | GGTGTCGCTG | CAGTACCGCG | TGGCCAGYCT |
| Alive_2        | TCGGAGGAGA | ACGTGATCGT | GGTGTCGCTG | CAGTACCGCG | TGGCCAGTCT |



|                |            |            |            |            |            |
|----------------|------------|------------|------------|------------|------------|
| KM875636_TOGO) | TCGATCAGAA | CCTTGCGCTA | CGGTAGGTGT | CTTTGCGTGT | GTGTCTGTAG |
| KP165343_GHANA | TCGATCAGAA | CCTTGCGCTA | CGGTAGGTGT | CTTTGCGTGT | GTGTCTGTAG |
| Alive_1        | TCGATCAGAA | CCTTGCGCTA | CGGTAGGTGT | CTTTGCRTGT | GTGWMTGWRG |
| Alive_2        | TCGATCAGAA | CCTTGCGCTA | CGGTAGGTGT | CTTTGCGTGT | GTGTCTGTAG |
| Alive_3        | TCGATCAGAA | CCTTGCGCTA | CGGTAGGTGT | CTTTGCGTGT | GTGTCTGTAG |
| Alive_4        | TCGATCAGAA | CCTTGCGCTA | CGGTAGGTGT | CTTTGCgTGT | GTGTCTGTAG |
| Alive_5        | TCGATCAGAA | CCTTGCGCTA | CGGTAGGTGT | CTTTGCGTGT | GTGTCTGTAG |
| Alive_6        | TCGATCAGAA | CCTTGCGCTA | CGGTAGGTGT | CTTTGCATGT | GTGAATGAGA |
| Alive_7        | TCGATCAGAA | CCTTGCGCTA | CGGTAGGTGT | CTTTGCRTGT | GTGWMTGTAG |
| Alive_8        | TCGATCAGAA | CCTTGCGCTA | CGGTAGGTGT | CTYTGCATGK | GTGAATGAGG |
| Dead_1         | TCGATCAGAA | CCTTGCGCTA | CGGTAGGTGT | CTTTGCATGT | GTGAATGAGG |
| Dead_2         | TCGATCAGAA | CCTTGCGCTA | CGGTAGGTGT | CTTTGCATGT | GTGAATGAGR |
| Dead_3         | TCGATCAGAA | CCTTGCGCTA | CGGTAGGTGT | CTTTGCATGT | GTGAATGAGG |
| Dead_4         | TCGATCAGAA | CCTTGCGCTA | CGGTAGGTGT | CTTTGCATGT | GTGAATGAGG |
| Dead_5         | TCGATCAGAA | CCTTGCGCTA | CGGTAGGTGT | CTTTGCATGT | GTGAATGAGG |
| Dead_6         | TCGATCAGAA | CCTTGCGCTA | CGGTAGGTGT | CTTTGCATGT | GTGAATGAGR |
| Dead_7         | TCGATCAGAA | CCTTGCGCTA | CGGTAGGTGT | CTTTGCATGT | GTGAATGAGG |
| Dead_8         | TCGATCAGAA | CCTTGCGCTA | CGGTAGGTGT | CTTTGCATGT | GTGAATGAGA |
| Fo_1           | TCGATCAGAA | CCTTGCGCTA | CGGTAGGTGT | CTTTGCGTGT | GTGTCTGTAG |
| Fo_2           | TCGATCAGAA | CCTTGCGCTA | CGGTAGGTGT | CTTTGCGTGT | GTGTCTGTAG |
| Fo_3           | TCGATCAGAA | CCTTGCGCTA | CGGTAGGTGT | CTTTGCGTGT | GTGTCTGTAG |
| Fo_4           | TCGATCAGAA | CCTTGCGCTA | CGGTAGGTGT | CTTTGCGTGT | GTGTCTGTAG |
| Fo_5           | TCGATCAGAA | CCTTGCGCTA | CGGTAGGTGT | CTYTGCATGK | GTGAATGAGG |
| Fo_6           | TCGATCAGAA | CCTTGCGCTA | CGGTAGGTGT | CTTTGCGTGT | GTGTCTGTAG |
| Fo_7           | TCGATCAGAA | CCTTGCGCTA | CGGTAGGTGT | CTTTGCATGT | GTGAATGAGG |
| Fo_8           | TCGATCAGAA | CCTTGCGCTA | CGGTAGGTGT | CWTTGCATGT | GTGAATGAGG |
| Fo_9           | TCGATCAGAA | CCTTGCGCTA | CGGTAGGTGT | CTTTGCRTGT | GTGMTGTAG  |
| Fo_10          | TCGATCAGAA | CCTTGCGCTA | CGGTAGGTGT | CTTTGCRTGT | GTGWMTGWRG |
| Fo_11          | TCGATCAGAA | CCTTGCGCTA | CGGTAGGTGT | CTTTGCGTGT | GTGTCTGTAG |
| Fo_12          | TCGATCAGAA | CCTTGCGCTA | CGGTAGGTGT | CTTTGCRTGT | GTGWMTGWRG |

|                | 610        | 620        | 630        | 640        | 650        |
|----------------|------------|------------|------------|------------|------------|
| KM875636_TOGO) | .... ....  | .... ....  | .... ....  | .... ....  | .... ....  |
| KP165343_GHANA | TTATAGTATT | CTAACGAGGT | GCTCTTCTTC | CCATCACTTC | TTGGGAGTCA |
| Alive_1        | TTATAGTATT | CTAACGAGGT | GCTCTTCTTC | CCATCACTTC | TTGGGAGTCA |
| Alive_2        | TTATAGTATT | CTAACGAGGT | GCTCTTCTTC | CCATCACTTC | TTGGGAGTCA |
| Alive_3        | TTATAGTATT | CTAACGAGGT | GCTCTTCTTC | CCATCACTTC | TTGGGAGTCA |
| Alive_4        | TTATAGTATT | CTAACGAGGT | GCTCTTCTTC | CCATCACTTC | TTGGGAGTCA |
| Alive_5        | TTATAGTATT | CTAACGAGGT | GCTCTTCTTC | CCATCACTTC | TTGGGAGTCA |
| Alive_6        | GTATAGTATT | CTAACGAGGT | GCTCTTCTTC | CCATCACTTC | TTGGGAGTCA |
| Alive_7        | KTATAGTATT | CTAACGAGGT | GCTCTTCTTC | CCATCACTTC | TTGGGAGTCA |
| Alive_8        | STWTAGTATT | CTAACGAGGT | GCTCTTCTTC | CCATCACTTC | TYGGGAGTCA |
| Dead_1         | GTATAGTATT | CTAACGAGGT | GCTCTTCTTC | CCATCACTTC | TTGGGAGTCA |
| Dead_2         | GTATAGTATT | CTAACGAGGT | GCTCTTCTTC | CCATCACTTC | TTGGGAGTCA |
| Dead_3         | GTATAGTATT | CTAACGAGGT | GCTCTTCTTC | CCATCACTTC | TTGGGAGTCA |
| Dead_4         | GTATAGTATT | CTAACGAGGT | GCTCTTCTTC | CCATCACTTC | TTGGGAGTCA |
| Dead_5         | GTATAGTATT | CTAACGAGGT | GCTCTTCTTC | CCATCACTTC | TTGGGAGTCA |
| Dead_6         | GTATAGTATT | CTAACGAGGT | GCTCTTCTTC | CCATCACTTC | TTGGGAGTCA |
| Dead_7         | GTATAGTATT | CTAACGAGGT | GCTCTTCTTC | CCATCACTTC | TTGGGAGTCA |
| Dead_8         | RTATAGTATT | CTAACGAGGT | GCTCTTCTTC | CCATCACTTC | TTGGGAGTCA |
| Fo_1           | TTATAGTATT | CTAACGAGGT | GCTCTTCTTC | CCATCACTTC | TTGGGAGTCA |
| Fo_2           | TTATAGTATT | CTAACGAGGT | GCTCTTCTTC | CCATCACTTC | TTGGGAGTCA |
| Fo_3           | TTATAGTATT | CTAACGAGGT | GCTCTTCTTC | CCATCACTTC | TTGGGAGTCA |
| Fo_4           | TTATAGTATT | CTAACGAGGT | GCTCTTCTTC | CCATCACTTC | TTGGGAGTCA |
| Fo_5           | STATAGTATT | CTAACGAGGT | GCTCTTCTTC | CCATCACTTC | TYGGGAGTCA |
| Fo_6           | TTATAGTATT | CTAACGAGGT | GCTCTTCTTC | CCATCACTTC | TTGGGAGTCA |
| Fo_7           | GTATAGTATT | CTAACGAGGT | GCTCTTCTTC | CCATCACTTC | TTGGGAGTCA |
| Fo_8           | GTATAGTATT | CTAACGAGGT | GCTCTTCTTC | CCATCACTTC | TTGGGAGTCA |
| Fo_9           | KTATAGTATT | CTAACGAGGT | GCTCTTCTTC | CCATCACTTC | TTGGGAGTCA |
| Fo_10          | KTATAGTATT | CTAACGAGGT | GCTCTTCTTC | CCATCACTTC | TTGGGAGTCA |
| Fo_11          | TTATAGTATT | CTAACGAGGT | GCTCTTCTTC | CCATCACTTC | TTGGGAGTCA |

Fo\_12

YTATAGTATT CTAACGAGGT GCTCTTCTTC CCATCACTTC TTGGGAGTCA

|                | 660        | 670        | 680         | 690        | 700        |
|----------------|------------|------------|-------------|------------|------------|
|                | .... ....  | .... ....  | .... ....   | .... ....  | .... ....  |
| KM875636_TOGO) | GCTGGGTGCG | GGACAACATT | CACCGGTTTCG | GTGGTGATCC | GTCGCGCGTG |
| KP165343_GHANA | GCTGGGTGCG | GGACAACATT | CACCGGTTTCG | GTGGTGATCC | GTCGCGCGTG |
| Alive_1        | GCTGGGTGCG | GGACAACATT | CACCGGTTTCG | GTGGTGATCC | GTCGCGCGTG |
| Alive_2        | GCTGGGTGCG | GGACAACATT | CACCGGTTTCG | GTGGTGATCC | GTCGCGCGTG |
| Alive_3        | GCTGGGTGCG | GGACAACATT | CACCGGTTTCG | GTGGTGATCC | GTCGCGCGTG |
| Alive_4        | GCTGGGTGCG | GGACAACATT | CACCGGTTTCG | GTGGTGATCC | GTCGCGYGTG |
| Alive_5        | GCTGGGTGCG | GGACAACATT | CACCGGTTTCG | GTGGTGATCC | GTCGCGCGTG |
| Alive_6        | GCTGGGTGCG | GGACAACATT | CACCGGTTTCG | GTGGCGATCC | GTCGCGTGTG |
| Alive_7        | GCTGGGTGCG | GGACAACATT | CACCGGTTTCG | GTGGTGATCC | GTCGCGCGTG |
| Alive_8        | GCTGGGTGCG | GGACAACATT | CACCGGTTTCG | GTGGTGATCC | GTCGCGTGTG |
| Dead_1         | GCTGGGTGCG | GGACAACATT | CACCGGTTTCG | GTGGCGATCC | GTCGCGTGTG |
| Dead_2         | GCTGGGTGCG | GGACAACATT | CACCGGTTTCG | GTGGCGATCC | GTCGCGTGTG |
| Dead_3         | GCTGGGTGCG | GGACAACATT | CACCGGTTTCG | GTGGCGATCC | GTCGCGTGTG |
| Dead_4         | GCTGGGTGCG | GGACAACATT | CACCGGTTTCG | GTGGCGATCC | GTCGCGTGTG |
| Dead_5         | GCTGGGTGCG | GGACAACATT | CACCGGTTTCG | GTGGCGATCC | GTCGCGTGTG |
| Dead_6         | GCTGGGTGCG | GGACAACATT | CACCGGTTTCG | GTGGCGATCC | GTCGCGTGTG |
| Dead_7         | GCTGGGTGCG | GGACAACATT | CACCGGTTTCG | GTGGCGATCC | GTCGCGTGTG |
| Dead_8         | GCTGGGTGCG | GGACAACATT | CACCGGTTTCG | GTGGCGATCC | GTCGCGTGTG |
| Fo_1           | GCTGGGTGCG | GGACAACATT | CACCGGTTTCG | GTGGTGATCC | GTCGCGCGTG |
| Fo_2           | GCTGGGTGCG | GGACAACATT | CACCGGTTTCG | GTGGTGATCC | GTCGCGCGTG |
| Fo_3           | GCTGGGTGCG | GGACAACATT | CACCGGTTTCG | GTGGTGATCC | GTCGCGCGTG |
| Fo_4           | GCTGGGTGCG | GGACAACATT | CACCGGTTTCG | GTGGTGATCC | GTCGCGCGTG |
| Fo_5           | GCTGGGTGCG | GGACAACATT | CACCGGTTTCG | GTGGTGATCC | GTCGCGTGTG |
| Fo_6           | GCTGGGTGCG | GGACAACATT | CACCGGTTTCG | GTGGTGATCC | GTCGCGCGTG |
| Fo_7           | GCTGGGTGCG | GGACAACATT | CACCGGTTTCG | GTGGCGATCC | GTCGCGTGTG |
| Fo_8           | GCTGGGTGCG | GGACAACATT | CACCGGTTTCG | GTGGTGATCC | GTCGCGTGTG |
| Fo_9           | GCTGGGTGCG | GGACAACATT | CACCGGTTTCG | GTGGTGATCC | GTCGCGCGTG |
| Fo_10          | GCTGGGTGCG | GGACAACATT | CACCGGTTTCG | GTGGTGATCC | GTCGCGCGTG |
| Fo_11          | GCTGGGTGCG | GGACAACATT | CACCGGTTTCG | GTGGTGATCC | GTCGCGCGTG |
| Fo_12          | GCTGGGTGCG | GGACAACATT | CACCGGTTTCG | GTGGTGATCC | GTCGCGCGTG |

|                |       |
|----------------|-------|
|                | ....  |
| KM875636_TOGO) | ACACT |
| KP165343_GHANA | ACACT |
| Alive_1        | ACACT |
| Alive_2        | ACACT |
| Alive_3        | ACACT |
| Alive_4        | ACACT |
| Alive_5        | ACACT |
| Alive_6        | ACACT |
| Alive_7        | ACACT |
| Alive_8        | ACACT |
| Dead_1         | ACACT |
| Dead_2         | ACACT |
| Dead_3         | ACACT |
| Dead_4         | ACACT |
| Dead_5         | ACACT |
| Dead_6         | ACACT |
| Dead_7         | ACACT |
| Dead_8         | ACACT |
| Fo_1           | ACAYT |
| Fo_2           | ACACT |
| Fo_3           | ACACT |
| Fo_4           | ACACT |
| Fo_5           | ACACT |
| Fo_6           | ACACT |
| Fo_7           | ACACT |



|              |       |
|--------------|-------|
| <b>Fo_8</b>  | ACACT |
| <b>Fo_9</b>  | ACACT |
| <b>Fo_10</b> | ACACT |
| <b>Fo_11</b> | ACACT |
| <b>Fo_12</b> | ACACT |
