# Supplementary material for: The G119S Acetylcholinesterase (Ace-1) Target Site Mutation Confers Carbamate Resistance in the Major Malaria Vector <em>Anopheles gambiae</em> from Cameroon: A Challenge for the Coming IRS Implementation
Source: Preprints.org preprint supplement (doi:10.20944/preprints201909.0012.v1), 2019-09-01
Supplement: Supplementary file 2 [file supplementary]

**Additional file 2:** Alignment of cloned *Ace-I* sequences from alive mosquitoes 24h after exposure to bendiocarb and propoxur in comparison of the sequence from the susceptible lab strain (Kisumu).

|            |             |             |             |             |             |
|------------|-------------|-------------|-------------|-------------|-------------|
|            | 10          | 20          | 30          | 40          | 50          |
| Kisumu     | ..... ..... | ..... ..... | ..... ..... | ..... ..... | ..... ..... |
|            | GGTCACGGTG  | AGTCCGTACG  | AATTATAGAT  | GCCGAGTTGG  | GCACGCTCGA  |
| Ben_A1_3   | ..... ..... | ..... ..... | ..... ..... | ..... ..... | ..... ..... |
| Ben_A1_4   | ..... ..... | ..... ..... | ..... ..... | ..... ..... | ..... ..... |
| Ben_A1_5   | ..... ..... | ..... ..... | ..... ..... | ..... ..... | ..... ..... |
| Ben_A4_1   | ..... ..... | ..... ..... | ..... ..... | ..... ..... | ..... ..... |
| Ben_A4_3   | ..... ..... | ..... ..... | ..... ..... | ..... ..... | ..... ..... |
| Ben_A4_5   | ..... ..... | ..... ..... | ..... ..... | ..... ..... | ..... ..... |
| Ben_A7_1   | ..... ..... | ..... ..... | ..... ..... | ..... ..... | ..... ..... |
| Ben_A7_2   | ..... ..... | ..... ..... | ..... ..... | ..... ..... | ..... ..... |
| Ben_A7_3   | ..... ..... | ..... ..... | ..... ..... | ..... ..... | ..... ..... |
| Ben_A7_5   | ..... ..... | ..... ..... | ..... ..... | ..... ..... | ..... ..... |
| Ben_A7_6   | ..... ..... | ..... ..... | ..... ..... | ..... ..... | ..... ..... |
| Prop_A5_1  | ..... ..... | ..... ..... | ..... ..... | ..... ..... | ..... ..... |
| Prop_A5_4  | ..... ..... | ..... ..... | ..... ..... | ..... ..... | ..... ..... |
| Prop_A5_6  | ..... ..... | ..... ..... | ..... ..... | ..... ..... | ..... ..... |
| Prop_A8_2  | ..... ..... | ..... ..... | ..... ..... | ..... ..... | ..... ..... |
| Prop_A8_3  | ..... ..... | ..... ..... | ..... ..... | ..... ..... | ..... ..... |
| Prop_A8_4  | ..... ..... | ..... ..... | ..... ..... | ..... ..... | ..... ..... |
| Prop_A9_1  | ..... ..... | ..... ..... | ..... ..... | ..... ..... | ..... ..... |
| Prop_A9_2  | ..... ..... | ..... ..... | ..... ..... | ..... ..... | ..... ..... |
| Prop_A9_3  | ..... ..... | ..... ..... | ..... ..... | ..... ..... | ..... ..... |
| Prop_A9_4  | ..... ..... | ..... ..... | ..... ..... | ..... ..... | ..... ..... |
| Prop_A10_1 | ..... ..... | ..... ..... | ..... ..... | ..... ..... | ..... ..... |
| Prop_A10_3 | ..... ..... | ..... ..... | ..... ..... | ..... ..... | ..... ..... |
| Prop_A10_5 | ..... ..... | ..... ..... | ..... ..... | ..... ..... | ..... ..... |
| Prop_A10_2 | ..... ..... | ..... ..... | ..... ..... | ..... ..... | ..... ..... |
| Prop_A10_4 | ..... ..... | ..... ..... | ..... ..... | ..... ..... | ..... ..... |
|            | 60          | 70          | 80          | 90          | 100         |
| Kisumu     | ..... ..... | ..... ..... | ..... ..... | ..... ..... | ..... ..... |
|            | GCA         | TGTCCCA     | CAGTGGAGCA  | ACGCCGCGGC  | GACGCGGCCT  |
|            |             |             |             |             | GACGAGGCGC  |
| Ben_A1_3   | ..... ..... | ..... ..... | ..... ..... | ..... ..... | ..... ..... |
| Ben_A1_4   | ..... ..... | ..... ..... | ..... ..... | ..... ..... | ..... ..... |
| Ben_A1_5   | ..... ..... | ..... ..... | ..... ..... | ..... ..... | ..... ..... |
| Ben_A4_1   | ..... ..... | ..... ..... | ..... ..... | ..... ..... | ..... ..... |
| Ben_A4_3   | ..... ..... | ..... ..... | ..... ..... | ..... ..... | ..... ..... |
| Ben_A4_5   | ..... ..... | ..... ..... | ..... ..... | ..... ..... | ..... ..... |
| Ben_A7_1   | ..... ..... | ..... ..... | ..... ..... | ..... ..... | ..... ..... |
| Ben_A7_2   | ..... ..... | ..... ..... | ..... ..... | ..... ..... | ..... ..... |
| Ben_A7_3   | ..... ..... | ..... ..... | ..... ..... | ..... ..... | ..... ..... |
| Ben_A7_5   | ..... ..... | ..... ..... | ..... ..... | ..... ..... | ..... ..... |
| Ben_A7_6   | ..... ..... | ..... ..... | ..... ..... | ..... ..... | ..... ..... |
| Prop_A5_1  | ..... ..... | ..... ..... | ..... ..... | ..... ..... | ..... ..... |
| Prop_A5_4  | ..... ..... | ..... ..... | ..... ..... | ..... ..... | ..... ..... |
| Prop_A5_6  | ..... ..... | ..... ..... | ..... ..... | ..... ..... | ..... ..... |
| Prop_A8_2  | ..... ..... | ..... ..... | ..... ..... | ..... ..... | ..... ..... |
| Prop_A8_3  | ..... ..... | ..... ..... | ..... ..... | ..... ..... | ..... ..... |
| Prop_A8_4  | ..... ..... | ..... ..... | ..... ..... | ..... ..... | ..... ..... |
| Prop_A9_1  | ..... ..... | ..... ..... | ..... ..... | ..... ..... | ..... ..... |
| Prop_A9_2  | ..... ..... | ..... ..... | ..... ..... | ..... ..... | ..... ..... |
| Prop_A9_3  | ..... ..... | ..... ..... | ..... ..... | ..... ..... | ..... ..... |

|            |       |       |       |                |
|------------|-------|-------|-------|----------------|
| Prop_A9_4  | ..... | ..... | ..... | .....T..T..... |
| Prop_A10_1 | ..... | ..... | ..... | .....T.....    |
| Prop_A10_3 | ..... | ..... | ..... | .....T.....    |
| Prop_A10_5 | ..... | ..... | ..... | .....T.....    |
| Prop_A10_2 | ..... | ..... | ..... | .....T.....    |
| Prop_A10_4 | ..... | ..... | ..... | .....T.....    |

  

|            | 110         | 120          | 130        | 140         | 150        |
|------------|-------------|--------------|------------|-------------|------------|
| Kisumu     | .... ....   | .... ....    | .... ....  | .... ....   | .... ....  |
| Ben_A1_3   | GAGTCAAAC   | TGCGGGTAAGTA | CGCGATTGGA | AGTGGGGGGA  | CGTTTACCCT |
| Ben_A1_4   | .....       | .....        | .....      | .....       | .....      |
| Ben_A1_5   | .....       | .....        | .....      | .....       | .....      |
| Ben_A4_1   | .....       | .....        | .....      | .....       | .....      |
| Ben_A4_3   | .....       | .....        | .....      | .....       | .....      |
| Ben_A4_5   | .....       | .....        | .....      | .....       | .....      |
| Ben_A7_1   | .....       | .....        | .....      | .....       | .....      |
| Ben_A7_2   | .....       | .....        | .....      | .....       | .....      |
| Ben_A7_3   | .....       | .....        | .....      | .....       | .....      |
| Ben_A7_5   | .....       | .....        | .....      | .....       | .....      |
| Ben_A7_6   | .....       | .....        | .....      | .....       | .....      |
| Prop_A5_1  | .....       | .....        | .....      | .....       | .....      |
| Prop_A5_4  | .....       | .....        | .....      | .....       | .....      |
| Prop_A5_6  | .....       | .....        | .....      | .....       | .....      |
| Prop_A8_2  | .....       | .....        | .....      | .....       | .....      |
| Prop_A8_3  | .....       | .....        | .....      | .....       | .....      |
| Prop_A8_4  | .....       | .....        | .....      | .....       | .....      |
| Prop_A9_1  | .....       | .....        | .....      | .....       | .....      |
| Prop_A9_2  | .....       | .....        | .....      | .....       | .....      |
| Prop_A9_3  | .....       | .....        | .....      | .....       | .....      |
| Prop_A9_4  | .....C..... | .....        | .....      | .....A..... | .....      |
| Prop_A10_1 | .....       | .....        | .....      | .....       | .....      |
| Prop_A10_3 | .....       | .....        | .....      | .....       | .....      |
| Prop_A10_5 | .....       | .....        | .....      | .....       | .....      |
| Prop_A10_2 | .....       | .....        | .....      | .....       | .....      |
| Prop_A10_4 | .....C..... | .....        | .....      | .....A..... | .....      |

  

|           | 160       | 170       | 180         | 190        | 200        |            |
|-----------|-----------|-----------|-------------|------------|------------|------------|
| Kisumu    | .... .... | .... .... | .... ....   | .... ....  | .... ....  |            |
| Ben_A1_3  | ACCGTG    | TACTACT   | ACTACAACGC  | ACTTTACCCC | CACGCACACG | CACCGGCAGA |
| Ben_A1_4  | .....     | .....     | .....       | .....      | .....      |            |
| Ben_A1_5  | .....     | .....     | .....       | .....      | .....      |            |
| Ben_A4_1  | .....     | .....     | .....       | .....      | .....      |            |
| Ben_A4_3  | .....     | .....     | .....       | .....      | .....      |            |
| Ben_A4_5  | .....     | .....     | .....       | .....      | .....      |            |
| Ben_A7_1  | .....     | .....     | .....       | .....      | .....      |            |
| Ben_A7_2  | .....     | .....     | .....       | .....      | .....      |            |
| Ben_A7_3  | .....     | .....     | .....       | .....      | .....      |            |
| Ben_A7_5  | .....     | .....     | .....       | .....      | .....      |            |
| Ben_A7_6  | .....     | .....     | .....       | .....      | .....      |            |
| Prop_A5_1 | .....     | .....     | .....       | .....      | .....      |            |
| Prop_A5_4 | .....     | .....     | .....       | .....      | .....      |            |
| Prop_A5_6 | .....     | .....     | .....       | .....      | .....      |            |
| Prop_A8_2 | .....     | .....     | .....       | .....      | .....      |            |
| Prop_A8_3 | .....     | .....     | .....A..... | .....      | .....      |            |
| Prop_A8_4 | .....     | .....     | .....A..... | .....      | .....      |            |

|            |             |       |       |       |       |
|------------|-------------|-------|-------|-------|-------|
| Prop_A9_1  | .....       | ..... | ..... | ..... | ..... |
| Prop_A9_2  | .....       | ..... | ..... | ..... | ..... |
| Prop_A9_3  | .....       | ..... | ..... | ..... | ..... |
| Prop_A9_4  | .....       | ..... | ..... | ..... | ..... |
| Prop_A10_1 | .....       | ..... | ..... | ..... | ..... |
| Prop_A10_3 | .....C..... | ..... | ..... | ..... | ..... |
| Prop_A10_5 | .....       | ..... | ..... | ..... | ..... |
| Prop_A10_2 | .....       | ..... | ..... | ..... | ..... |
| Prop_A10_4 | .....       | ..... | ..... | ..... | ..... |

|            |            |            |            |            |            |
|------------|------------|------------|------------|------------|------------|
|            | 210        | 220        | 230        | 240        | 250        |
| Kisumu     | .... ....  | .... ....  | .... ....  | .... ....  | .... ....  |
| Ben_A1_3   | CGCGAACGAC | AACGATCCGC | TGGTGGTCAA | CACGGATAAG | GGGCGCATCC |
| Ben_A1_4   | .....      | .....      | .....      | .....      | .....      |
| Ben_A1_5   | .....      | .....      | .....      | .....      | .....      |
| Ben_A4_1   | .....      | .....      | .....      | .....      | .....      |
| Ben_A4_3   | .....      | .....      | .....      | .....      | .....      |
| Ben_A4_5   | .....      | .....      | .....      | .....      | .....      |
| Ben_A7_1   | .....      | .....      | .....      | .....      | .....      |
| Ben_A7_2   | .....      | .....      | .....      | .....      | .....      |
| Ben_A7_3   | .....      | ..T.....   | .....      | .....      | .....      |
| Ben_A7_5   | .....      | .....      | .....      | .....      | .....      |
| Ben_A7_6   | .....      | .....      | .....      | .....      | .....      |
| Prop_A5_1  | .....      | .....      | .....      | .....      | .....      |
| Prop_A5_4  | .....      | .....      | .....      | .....      | .....      |
| Prop_A5_6  | .....      | .....      | ..T.....   | .....      | .....      |
| Prop_A8_2  | .....      | .....      | .....      | .....      | .....      |
| Prop_A8_3  | .....      | .....      | .....      | .....      | .....      |
| Prop_A8_4  | .....      | .....      | .....      | .....      | .....      |
| Prop_A9_1  | .....      | .....      | .....      | .....      | .....      |
| Prop_A9_2  | .....      | .....      | .....      | .....      | .....      |
| Prop_A9_3  | .....      | .....      | .....      | .....      | .....      |
| Prop_A9_4  | .....      | .....      | .....      | .....      | .....      |
| Prop_A10_1 | .....      | .....      | .....      | .....      | .....      |
| Prop_A10_3 | .....      | .....      | .....      | .....      | .....      |
| Prop_A10_5 | .....      | .....      | .....      | .....      | .....      |
| Prop_A10_2 | .....      | .....      | .....      | .....      | .....      |
| Prop_A10_4 | .....      | .....      | .....      | .....      | .....      |

|           |            |            |            |            |            |
|-----------|------------|------------|------------|------------|------------|
|           | 260        | 270        | 280        | 290        | 300        |
| Kisumu    | .... ....  | .... ....  | .... ....  | .... ....  | .... ....  |
| Ben_A1_3  | GCGGCATTAC | GGTCGATGCG | CCCAGCGGCA | AGAAGGTGGA | CGTGTGGCTC |
| Ben_A1_4  | .....      | .....      | .....      | .....      | .....      |
| Ben_A1_5  | .....      | .....      | .....      | .....      | .....      |
| Ben_A4_1  | .....      | .....      | .....      | .....      | .....      |
| Ben_A4_3  | .....      | .....      | .....      | .....      | .....      |
| Ben_A4_5  | .....      | .....      | .....      | .....      | .....      |
| Ben_A7_1  | .....      | .....      | .....      | .....      | .....      |
| Ben_A7_2  | .....      | .....      | .....      | .....      | .....      |
| Ben_A7_3  | .....      | .....      | .....      | .....      | .....      |
| Ben_A7_5  | .....      | .....      | .....      | .....      | .....      |
| Ben_A7_6  | .....      | .....      | .....      | .....      | .....      |
| Prop_A5_1 | .....      | .....      | .....      | .....      | .....      |
| Prop_A5_4 | .....      | .....      | .....      | .....      | .....      |
| Prop_A5_6 | .....      | .....      | .....      | .....      | .....      |

|            |       |       |       |       |       |
|------------|-------|-------|-------|-------|-------|
| Prop_A8_2  | ..... | ..... | ..... | ..... | ..... |
| Prop_A8_3  | ..... | ..... | ..... | ..... | ..... |
| Prop_A8_4  | ..... | ..... | ..... | ..... | ..... |
| Prop_A9_1  | ..... | ..... | ..... | ..... | ..... |
| Prop_A9_2  | ..... | ..... | ..... | ..... | ..... |
| Prop_A9_3  | ..... | ..... | ..... | ..... | ..... |
| Prop_A9_4  | ..... | ..... | ..... | ..... | ..... |
| Prop_A10_1 | ..... | ..... | ..... | ..... | ..... |
| Prop_A10_3 | ..... | ..... | ..... | ..... | ..... |
| Prop_A10_5 | ..... | ..... | ..... | ..... | ..... |
| Prop_A10_2 | ..... | ..... | ..... | ..... | ..... |
| Prop_A10_4 | ..... | ..... | ..... | ..... | ..... |

|            |             |             |             |             |             |
|------------|-------------|-------------|-------------|-------------|-------------|
|            | 310         | 320         | 330         | 340         | 350         |
| Kisumu     | ..... ..... | ..... ..... | ..... ..... | ..... ..... | ..... ..... |
|            | GGCATTCCCT  | ACGCCCAGCC  | GCCGGTCGGG  | CCGCTACGTT  | CCGTCATCCG  |
| Ben_A1_3   | .....       | .....       | T.....C     | .....A..    | .....       |
| Ben_A1_4   | .....       | .....       | T.....C     | .....A..    | .....       |
| Ben_A1_5   | .....       | .....       | .....       | .....       | .....       |
| Ben_A4_1   | .....       | .....       | .....       | .....       | .....       |
| Ben_A4_3   | .....       | .....       | .....       | .....       | .....       |
| Ben_A4_5   | .....       | .....       | .....       | .....       | .....       |
| Ben_A7_1   | .....       | .....       | .....       | .....       | .....       |
| Ben_A7_2   | .....       | .....       | .....       | .....       | .....       |
| Ben_A7_3   | .....       | .....       | .....       | .....       | .....       |
| Ben_A7_5   | .....       | .....       | .....       | .....       | .....       |
| Ben_A7_6   | .....       | .....       | .....       | .....       | .....       |
| Prop_A5_1  | .....       | .....       | .....       | .....       | .....       |
| Prop_A5_4  | .....       | .....       | .....       | .....       | .....       |
| Prop_A5_6  | .....       | .....       | .....       | .....       | .....       |
| Prop_A8_2  | .....       | .....       | .....       | .....       | .....       |
| Prop_A8_3  | .....       | .....       | T.....C     | .....A..    | .....       |
| Prop_A8_4  | .....       | .....       | T.....C     | .....A..    | .....       |
| Prop_A9_1  | .....       | .....       | .....       | .....       | .....       |
| Prop_A9_2  | .....       | .....       | .....       | .....       | .....       |
| Prop_A9_3  | .....       | .....       | .....       | .....       | .....       |
| Prop_A9_4  | .....       | .....       | T.....C     | .....A..    | .....       |
| Prop_A10_1 | .....       | .....       | .....       | .....       | .....T.     |
| Prop_A10_3 | .....       | .....       | .....       | .....       | .....       |
| Prop_A10_5 | .....       | .....       | .....       | .....       | .....       |
| Prop_A10_2 | .....       | .....       | .....       | .....       | .....       |
| Prop_A10_4 | .....       | .....       | .....       | .....       | .....       |

|          |             |             |             |             |             |
|----------|-------------|-------------|-------------|-------------|-------------|
|          | 360         | 370         | 380         | 390         | 400         |
| Kisumu   | ..... ..... | ..... ..... | ..... ..... | ..... ..... | ..... ..... |
|          | CGGCCGCCGA  | AAAGTGGACC  | GGCGTGCTGA  | ACACGACCAC  | ACCGCCCAAC  |
| Ben_A1_3 | .....       | .....       | .....       | .....       | .....       |
| Ben_A1_4 | .....       | .....       | .....       | .....       | .....       |
| Ben_A1_5 | .....       | .....       | .....       | .....       | .....       |
| Ben_A4_1 | .....       | .....       | .....       | .....       | .....       |
| Ben_A4_3 | .....       | .....       | .....       | .....       | .....       |
| Ben_A4_5 | .....       | .....       | .....       | .....       | .....       |
| Ben_A7_1 | .....       | .....       | .....       | .....       | .....       |
| Ben_A7_2 | .....       | .....       | .....       | .....       | .....       |
| Ben_A7_3 | .....       | .....       | .....       | .....       | .....       |
| Ben_A7_5 | .....       | .....       | .....       | .....       | .....       |
| Ben_A7_6 | .....       | .....       | .....       | .....       | .....       |

|            |       |       |       |       |       |
|------------|-------|-------|-------|-------|-------|
| Prop_A5_1  | ..... | ..... | ..... | ..... | ..... |
| Prop_A5_4  | ..... | ..... | ..... | ..... | ..... |
| Prop_A5_6  | ..... | ..... | ..... | ..... | ..... |
| Prop_A8_2  | ..... | ..... | ..... | ..... | ..... |
| Prop_A8_3  | ..... | ..... | ..... | ..... | ..... |
| Prop_A8_4  | ..... | ..... | ..... | ..... | ..... |
| Prop_A9_1  | ..... | ..... | ..... | ..... | ..... |
| Prop_A9_2  | ..... | ..... | ..... | ..... | ..... |
| Prop_A9_3  | ..... | ..... | ..... | ..... | ..... |
| Prop_A9_4  | ..... | ..... | ..... | ..... | ..... |
| Prop_A10_1 | ..... | ..... | ..... | ..... | ..... |
| Prop_A10_3 | ..... | ..... | ..... | ..... | ..... |
| Prop_A10_5 | ..... | ..... | ..... | ..... | ..... |
| Prop_A10_2 | ..... | ..... | ..... | ..... | ..... |
| Prop_A10_4 | ..... | ..... | ..... | ..... | ..... |

|            |             |             |             |             |             |
|------------|-------------|-------------|-------------|-------------|-------------|
|            | 410         | 420         | 430         | 440         | 450         |
| Kisumu     | ..... ..... | ..... ..... | ..... ..... | ..... ..... | ..... ..... |
|            | AGCTGCGTGC  | AGATCGTGGA  | CACCGTGTTT  | GGCGACTTCC  | CGGGCGCGAC  |
| Ben_A1_3   | .....       | .....       | .....       | .....       | .....       |
| Ben_A1_4   | .....       | .....       | .....       | .....       | .....       |
| Ben_A1_5   | .....       | .....       | .....       | .....       | .....       |
| Ben_A4_1   | .....       | .....       | .....       | .....       | .....       |
| Ben_A4_3   | .....       | .....       | .....       | .....       | .....       |
| Ben_A4_5   | .....       | .....       | .....       | .....       | .....       |
| Ben_A7_1   | .....       | .....       | .....       | .....       | .....       |
| Ben_A7_2   | .....       | .....       | .....       | .....       | .....       |
| Ben_A7_3   | .....       | .....       | .....       | .....       | .....       |
| Ben_A7_5   | .....       | .....       | .....       | .....       | .....       |
| Ben_A7_6   | .....       | .....       | .....       | .....       | .....       |
| Prop_A5_1  | .....       | .....       | .....       | .....       | .....       |
| Prop_A5_4  | .....       | .....       | .....       | .....       | .....       |
| Prop_A5_6  | .....       | .....       | .....       | .....       | .....       |
| Prop_A8_2  | .....       | .....       | .....       | .....       | .....       |
| Prop_A8_3  | .....       | .....       | .....       | .....       | .....       |
| Prop_A8_4  | .....       | .....       | .....       | .....       | .....       |
| Prop_A9_1  | .....       | .....       | .....       | .....       | .....       |
| Prop_A9_2  | .....       | .....       | .....       | .....       | .....       |
| Prop_A9_3  | .....       | .....       | .....       | .....       | .....       |
| Prop_A9_4  | .....       | .....       | .....       | .....       | .....       |
| Prop_A10_1 | .....       | .....       | .....       | .....       | .....       |
| Prop_A10_3 | .....       | .....       | .....       | .....       | .....       |
| Prop_A10_5 | .....       | .....       | .....       | .....       | .....       |
| Prop_A10_2 | .....       | .....       | .....       | .....       | .....       |
| Prop_A10_4 | .....       | .....       | .....       | .....       | .....       |

|          |             |             |             |             |             |
|----------|-------------|-------------|-------------|-------------|-------------|
|          | 460         | 470         | 480         | 490         | 500         |
| Kisumu   | ..... ..... | ..... ..... | ..... ..... | ..... ..... | ..... ..... |
|          | CATGTGGAAC  | CCGAACACGC  | CCCTGTCCGA  | GGACTGTCTG  | TACATTAAACG |
| Ben_A1_3 | .....       | .....       | .....       | .....       | .....       |
| Ben_A1_4 | .....       | .....       | .....       | .....       | .....       |
| Ben_A1_5 | .....       | .....       | .....       | .....       | .....       |
| Ben_A4_1 | .....       | .....       | .....       | .....       | .....       |
| Ben_A4_3 | .....       | .....       | .....       | .....       | .....       |
| Ben_A4_5 | .....       | .....       | .....       | .....       | .....       |
| Ben_A7_1 | .....       | .....       | .....       | .....       | .....       |
| Ben_A7_2 | .....       | .....       | .....       | .....       | .....       |

|            |             |
|------------|-------------|
| Ben_A7_3   | .....C..... |
| Ben_A7_5   | .....       |
| Ben_A7_6   | .....       |
| Prop_A5_1  | .....       |
| Prop_A5_4  | .....       |
| Prop_A5_6  | .....       |
| Prop_A8_2  | .....       |
| Prop_A8_3  | .....       |
| Prop_A8_4  | .....       |
| Prop_A9_1  | .....       |
| Prop_A9_2  | .....       |
| Prop_A9_3  | .....C..... |
| Prop_A9_4  | .....C..... |
| Prop_A10_1 | .....       |
| Prop_A10_3 | .....C..... |
| Prop_A10_5 | .....       |
| Prop_A10_2 | .....       |
| Prop_A10_4 | .....C..... |

|            |            |            |             |             |            |
|------------|------------|------------|-------------|-------------|------------|
|            | 510        | 520        | 530         | 540         | 550        |
| Kisumu     | .... ....  | .... ....  | .... ....   | .... ....   | .... ....  |
|            | TGGTGGCACC | GCGACCCCGG | CCCAAGAATG  | CGGCCGTTCAT | GCTGTGGATC |
| Ben_A1_3   | .....      | .....      | .....       | .....       | .....      |
| Ben_A1_4   | .....      | .....      | .....       | .....       | .....      |
| Ben_A1_5   | .....      | ..G..      | .....       | .....       | .....      |
| Ben_A4_1   | .....      | ..G..      | .....       | .....       | .....      |
| Ben_A4_3   | .....      | ..G..      | .....       | .....       | .....      |
| Ben_A4_5   | .....      | ..G..      | .....       | .....       | .....      |
| Ben_A7_1   | .....      | ..G..      | .....       | .....       | .....      |
| Ben_A7_2   | .....      | ..G..      | .....       | .....       | .....      |
| Ben_A7_3   | .....      | ..G..      | .....       | .....       | .....      |
| Ben_A7_5   | .....      | ..G..      | .....       | .....       | .....      |
| Ben_A7_6   | .....      | ..G..      | .....       | .....       | .....      |
| Prop_A5_1  | .....      | ..G..      | .....       | .....       | .....      |
| Prop_A5_4  | .....      | ..G..      | .....       | .....       | .....      |
| Prop_A5_6  | .....      | .....      | .....       | .....       | .....      |
| Prop_A8_2  | .....      | ..G..      | .....       | .....       | .....      |
| Prop_A8_3  | .....      | ..G..      | .....       | .....       | .....      |
| Prop_A8_4  | .....      | ..G..      | .....       | .....       | .....      |
| Prop_A9_1  | .....      | ..G..      | .....       | .....       | .....      |
| Prop_A9_2  | .....      | ..G..      | .....       | .....       | .....      |
| Prop_A9_3  | .....      | ..G..      | .....       | .....       | .....      |
| Prop_A9_4  | .....      | ..G..      | .....       | .....       | .....      |
| Prop_A10_1 | .....      | ..G..      | .....       | .....       | .....      |
| Prop_A10_3 | .....      | ..G..      | .....C..... | .....       | .....      |
| Prop_A10_5 | .....      | ..G..      | .....       | .....       | .....      |
| Prop_A10_2 | .....      | ..G..      | .....       | .....       | .....      |
| Prop_A10_4 | .....      | ..G..      | .....       | .....       | .....      |

|          |             |            |            |            |            |
|----------|-------------|------------|------------|------------|------------|
|          | 560         | 570        | 580        | 590        | 600        |
| Kisumu   | .... ....   | .... ....  | .... ....  | .... ....  | .... ....  |
|          | TTCGGCGGCG  | GCTTCTACTC | CGGCACCGCC | ACCCTGGACG | TGTACGACCA |
| Ben_A1_3 | .....A..... | .....      | .....      | .....      | .....      |
| Ben_A1_4 | .....       | .....      | .....      | .....      | .....      |
| Ben_A1_5 | .....A..... | .....      | .....      | .....      | .....      |
| Ben_A4_1 | .....A..... | .....      | .....      | .....      | .....      |
| Ben_A4_3 | .....A..... | .....      | .....      | .....      | .....      |

|            |             |       |       |       |       |
|------------|-------------|-------|-------|-------|-------|
| Ben_A4_5   | .....A..... | ..... | ..... | ..... | ..... |
| Ben_A7_1   | .....A..... | ..... | ..... | ..... | ..... |
| Ben_A7_2   | .....A..... | ..... | ..... | ..... | ..... |
| Ben_A7_3   | .....G..... | ..... | ..... | ..... | ..... |
| Ben_A7_5   | .....A..... | ..... | ..... | ..... | ..... |
| Ben_A7_6   | .....A..... | ..... | ..... | ..... | ..... |
| Prop_A5_1  | .....A..... | ..... | ..... | ..... | ..... |
| Prop_A5_4  | .....A..... | ..... | ..... | ..... | ..... |
| Prop_A5_6  | .....       | ..... | ..... | ..... | ..... |
| Prop_A8_2  | .....A..... | ..... | ..... | ..... | ..... |
| Prop_A8_3  | .....       | ..... | ..... | ..... | ..... |
| Prop_A8_4  | .....A..... | ..... | ..... | ..... | ..... |
| Prop_A9_1  | .....A..... | ..... | ..... | ..... | ..... |
| Prop_A9_2  | .....A..... | ..... | ..... | ..... | ..... |
| Prop_A9_3  | .....       | ..... | ..... | ..... | ..... |
| Prop_A9_4  | .....A..... | ..... | ..... | ..... | ..... |
| Prop_A10_1 | .....A..... | ..... | ..... | ..... | ..... |
| Prop_A10_3 | .....       | ..... | ..... | ..... | ..... |
| Prop_A10_5 | .....A..... | ..... | ..... | ..... | ..... |
| Prop_A10_2 | .....A..... | ..... | ..... | ..... | ..... |
| Prop_A10_4 | .....A..... | ..... | ..... | ..... | ..... |

|            |            |            |            |             |            |
|------------|------------|------------|------------|-------------|------------|
|            | 610        | 620        | 630        | 640         | 650        |
| Kisumu     | .... ....  | .... ....  | .... ....  | .... ....   | .... ....  |
|            | CCGGGCGCTT | GCGTCGGAGG | AGAACGTGAT | CGTGGTGTCTG | CTGCAGTACC |
| Ben_A1_3   | .....      | .....      | .....      | .....       | .....      |
| Ben_A1_4   | .....      | .....      | .....      | .....       | .....      |
| Ben_A1_5   | .....      | .....      | .....      | .....       | .....      |
| Ben_A4_1   | .....      | .....      | .....      | .....       | .....      |
| Ben_A4_3   | .....      | .....      | .....      | .....       | .....      |
| Ben_A4_5   | .....      | .....      | .....      | .....       | .....      |
| Ben_A7_1   | .....      | .....      | .....      | .....       | .....      |
| Ben_A7_2   | .....      | .....      | .....      | .....       | .....      |
| Ben_A7_3   | .....      | .....      | .....      | .....       | .....      |
| Ben_A7_5   | .....      | .....      | .....      | .....       | .....      |
| Ben_A7_6   | .....      | .....      | .....      | .....       | .....      |
| Prop_A5_1  | .....      | .....      | .....      | .....       | .....      |
| Prop_A5_4  | .....      | .....      | .....      | .....       | .....      |
| Prop_A5_6  | .....      | .....      | .....      | .....       | .....      |
| Prop_A8_2  | .....      | .....      | .....      | .....       | .....      |
| Prop_A8_3  | .....      | .....      | .....      | .....       | .....      |
| Prop_A8_4  | .....      | .....      | .....      | .....       | .....      |
| Prop_A9_1  | .....      | .....      | .....      | .....       | .....      |
| Prop_A9_2  | .....      | .....      | .....      | .....       | .....      |
| Prop_A9_3  | .....      | .....      | .....      | .....       | .....      |
| Prop_A9_4  | .....      | .....      | .....      | .....       | .....      |
| Prop_A10_1 | .....      | .....      | .....      | .....       | .....      |
| Prop_A10_3 | .....      | .....      | .....      | .....       | .....      |
| Prop_A10_5 | .....      | .....      | .....      | .....       | .....      |
| Prop_A10_2 | .....      | .....      | .....      | .....       | .....      |
| Prop_A10_4 | .....      | .....      | .....      | .....       | .....      |

|          |            |            |            |             |            |
|----------|------------|------------|------------|-------------|------------|
|          | 660        | 670        | 680        | 690         | 700        |
| Kisumu   | .... ....  | .... ....  | .... ....  | .... ....   | .... ....  |
|          | GCGTGGCCAG | TCTGGGCTTC | CTGTTTCTCG | GCACCCCGGA  | AGCGCCGGGC |
| Ben_A1_3 | .....      | .....      | .....      | .....C..... | .....      |
| Ben_A1_4 | .....      | .....      | .....      | .....       | .....      |

|            |       |       |       |        |       |
|------------|-------|-------|-------|--------|-------|
| Ben_A1_5   | ..... | ..... | ..... | .....  | ..... |
| Ben_A4_1   | ..... | ..... | ..... | .....C | ..... |
| Ben_A4_3   | ..... | ..... | ..... | .....C | ..... |
| Ben_A4_5   | ..... | ..... | ..... | .....C | ..... |
| Ben_A7_1   | ..... | ..... | ..... | .....C | ..... |
| Ben_A7_2   | ..... | ..... | ..... | .....C | ..... |
| Ben_A7_3   | ..... | ..... | ..... | .....  | ..... |
| Ben_A7_5   | ..... | ..... | ..... | .....  | ..... |
| Ben_A7_6   | ..... | ..... | ..... | .....C | ..... |
| Prop_A5_1  | ..... | ..... | ..... | .....C | ..... |
| Prop_A5_4  | ..... | ..... | ..... | .....C | ..... |
| Prop_A5_6  | ..... | ..... | ..... | .....  | ..... |
| Prop_A8_2  | ..... | ..... | ..... | .....C | ..... |
| Prop_A8_3  | ..... | ..... | ..... | .....  | ..... |
| Prop_A8_4  | ..... | ..... | ..... | .....C | ..... |
| Prop_A9_1  | ..... | ..... | ..... | .....C | ..... |
| Prop_A9_2  | ..... | ..... | ..... | .....C | ..... |
| Prop_A9_3  | ..... | ..... | ..... | .....  | ..... |
| Prop_A9_4  | ..... | ..... | ..... | .....C | ..... |
| Prop_A10_1 | ..... | ..... | ..... | .....C | ..... |
| Prop_A10_3 | ..... | ..... | ..... | .....  | ..... |
| Prop_A10_5 | ..... | ..... | ..... | .....C | ..... |
| Prop_A10_2 | ..... | ..... | ..... | .....C | ..... |
| Prop_A10_4 | ..... | ..... | ..... | .....C | ..... |

|            |             |             |             |             |             |
|------------|-------------|-------------|-------------|-------------|-------------|
|            | 710         | 720         | 730         | 740         | 750         |
| Kisumu     | ..... ..... | ..... ..... | ..... ..... | ..... ..... | ..... ..... |
|            | AATGCGGGAC  | TGTTTCGATCA | GAACCTTGCG  | CTACGGTAGG  | TGTCTTTGCA  |
| Ben_A1_3   | .....       | .....       | .....       | .....       | .....       |
| Ben_A1_4   | .....       | .....       | .....       | .....       | .....       |
| Ben_A1_5   | .....       | .....       | .....       | .....       | .....       |
| Ben_A4_1   | .....       | .....       | .....       | .....       | .....G      |
| Ben_A4_3   | .....       | .....       | .....       | .....       | .....G      |
| Ben_A4_5   | .....       | .....       | .....       | .....       | .....G      |
| Ben_A7_1   | .....       | .....       | .....       | .....       | .....G      |
| Ben_A7_2   | .....       | .....       | .....       | .....       | .....       |
| Ben_A7_3   | .....       | .....       | .....       | .....       | .....       |
| Ben_A7_5   | .....       | .....       | .....       | .....       | .....G      |
| Ben_A7_6   | .....       | .....       | .....       | .....       | .....G      |
| Prop_A5_1  | .....       | .....       | .....       | .....       | .....G      |
| Prop_A5_4  | .....       | .....       | .....       | .....       | .....G      |
| Prop_A5_6  | .....       | .....       | .....       | .....       | .....       |
| Prop_A8_2  | .....       | .....       | .....       | .....       | .....G      |
| Prop_A8_3  | .....       | .....       | .....       | .....       | .....C      |
| Prop_A8_4  | .....       | .....       | .....       | .....       | .....C      |
| Prop_A9_1  | .....       | .....       | .....       | .....       | .....G      |
| Prop_A9_2  | .....       | .....       | .....       | .....       | .....G      |
| Prop_A9_3  | .....       | .....       | .....       | .....       | .....G      |
| Prop_A9_4  | .....       | .....       | .....       | .....       | .....G      |
| Prop_A10_1 | .....       | .....       | .....       | .....       | .....G      |
| Prop_A10_3 | .....       | .....       | .....       | .....       | .....       |
| Prop_A10_5 | .....       | .....       | .....       | .....       | .....G      |
| Prop_A10_2 | .....       | .....       | .....       | .....       | .....G      |
| Prop_A10_4 | .....       | .....       | .....       | .....       | .....G      |
|            | 760         | 770         | 780         | 790         | 800         |
|            | ..... ..... | ..... ..... | ..... ..... | ..... ..... | ..... ..... |



|            |            |            |            |            |            |
|------------|------------|------------|------------|------------|------------|
| Kisumu     | TGTGTGAATG | AGGGTATAGT | ATTCTAACGA | GGTGCTCTTC | TTCCCATCAC |
| Ben_A1_3   | .....      | .....      | .....      | .....      | .....      |
| Ben_A1_4   | .....      | ..T..      | .....      | .....      | .....C.    |
| Ben_A1_5   | .....      | .....      | .....      | .....      | .....      |
| Ben_A4_1   | .....TC..  | TA.T.....  | .....      | .....      | .....      |
| Ben_A4_3   | .....TC..  | TA.T.....  | .....      | .....      | .....      |
| Ben_A4_5   | .....TC..  | TA.T.....  | .....      | .....      | .....      |
| Ben_A7_1   | .....TC..  | TA.T.....  | .....      | .....      | .....      |
| Ben_A7_2   | .....      | .....      | .....      | .....      | .....      |
| Ben_A7_3   | .....      | .....      | .....      | .....      | .....      |
| Ben_A7_5   | .....TC..  | TA.T.....  | .....      | .....      | .....      |
| Ben_A7_6   | .....TC..  | TA.T.....  | .....      | .....      | .....      |
| Prop_A5_1  | .....TC..  | TA.T.....  | .....      | .....      | .....      |
| Prop_A5_4  | .....TC..  | TA.T.....  | .....      | .....      | .....      |
| Prop_A5_6  | ..G.....   | .....      | .....      | .....      | .....      |
| Prop_A8_2  | .....TC..  | TA.T.....  | .....      | .....      | .....      |
| Prop_A8_3  | ..G.....   | .....      | .....      | .....      | .....      |
| Prop_A8_4  | ..G.....   | .....      | .....      | .....      | .....      |
| Prop_A9_1  | .....TC..  | TA.T.....  | .....      | .....      | .....      |
| Prop_A9_2  | .....TC..  | TA.T.....  | .....      | .....      | .....      |
| Prop_A9_3  | .....TC..  | TA.T.....  | .....      | .....      | .....      |
| Prop_A9_4  | .....TC..  | TA.T.....  | .....      | .....      | .....      |
| Prop_A10_1 | .....TC..  | TA.T.....  | .....      | .....      | .....      |
| Prop_A10_3 | .....      | .....      | .....T..   | .....      | .....      |
| Prop_A10_5 | .....TC..  | TA.T.....  | .....      | .....      | .....      |
| Prop_A10_2 | .....TC..  | TA.T.....  | .....      | .....      | .....      |
| Prop_A10_4 | .....TC..  | TA.T.....  | .....      | .....      | .....      |

|            |            |            |            |             |            |
|------------|------------|------------|------------|-------------|------------|
|            | 810        | 820        | 830        | 840         | 850        |
| Kisumu     | .... ....  | .... ....  | .... ....  | .... ....   | .... ....  |
| Ben_A1_3   | TTCTTGGGAG | TCAGCTGGGT | GCGGGACAAC | ATTCAACCGGT | TCGGTGGCGA |
| Ben_A1_4   | .....      | .....C..   | .....      | .....       | .....      |
| Ben_A1_5   | .....      | .....      | .....      | .....       | .....T..   |
| Ben_A4_1   | .....      | .....      | .....      | .....       | .....T..   |
| Ben_A4_3   | .....      | .....      | .....      | .....       | .....T..   |
| Ben_A4_5   | .....      | .....      | .....      | .....       | .....T..   |
| Ben_A7_1   | .....      | .....      | .....      | .....       | .....T..   |
| Ben_A7_2   | .....      | .....      | .....      | .....       | .....T..   |
| Ben_A7_3   | .....      | .....      | .....      | .....       | .....T..   |
| Ben_A7_5   | .....      | .....      | .....      | .....       | .....T..   |
| Ben_A7_6   | .....      | .....      | .....      | .....       | .....T..   |
| Prop_A5_1  | .....      | .....      | .....      | .....       | .....      |
| Prop_A5_4  | .....      | .....      | .....      | .....       | .....T..   |
| Prop_A5_6  | .....      | .....      | .....      | .....       | .....      |
| Prop_A8_2  | .....C..   | .....      | .....      | .....       | .....T..   |
| Prop_A8_3  | .....C..   | .....      | .....      | .....       | .....      |
| Prop_A8_4  | .....C..   | .....      | .....      | .....       | .....      |
| Prop_A9_1  | .....      | .....      | .....      | .....       | .....T..   |
| Prop_A9_2  | .....      | .....      | .....      | .....       | .....T..   |
| Prop_A9_3  | .....      | .....      | .....      | .....       | .....T..   |
| Prop_A9_4  | .....      | .....      | .....      | .....       | .....T..   |
| Prop_A10_1 | .....      | .....      | .....      | .....       | .....T..   |
| Prop_A10_3 | .....      | .....      | .....      | .....       | .....      |
| Prop_A10_5 | .....      | .....      | .....      | .....       | .....T..   |
| Prop_A10_2 | .....      | .....      | .....      | .....       | .....T..   |
| Prop_A10_4 | .....      | .....      | .....      | .....       | .....T..   |

|            | 860        | 870        | 880        | 890        | 900        |
|------------|------------|------------|------------|------------|------------|
| Kisumu     | .... ....  | .... ....  | .... ....  | .... ....  | .... ....  |
|            | TCCGTCGCGT | GTGACACTGT | TCGGCGAGAG | TGCCGGTGCC | GTCTCGGTGT |
| Ben_A1_3   | .....      | .....      | .....      | .....      | .....      |
| Ben_A1_4   | .....      | .....      | .....      | .....      | .....      |
| Ben_A1_5   | .....C     | .....      | .....      | .....      | .....      |
| Ben_A4_1   | .....C     | .....      | .....      | .....      | .....      |
| Ben_A4_3   | .....C     | .....      | .....      | .....      | .....      |
| Ben_A4_5   | .....C     | .....      | .....      | .....      | .....      |
| Ben_A7_1   | .....C     | .....      | .....      | .....      | .....      |
| Ben_A7_2   | .....C     | .....      | .....      | .....      | .....      |
| Ben_A7_3   | .....      | .....      | .....      | .....C     | .....      |
| Ben_A7_5   | .....C     | .....      | .....      | .....      | .....      |
| Ben_A7_6   | .....C     | .....      | .....      | .....      | .....      |
| Prop_A5_1  | .....      | .....      | .....      | .....C     | .....      |
| Prop_A5_4  | .....C     | .....      | .....      | .....      | .....      |
| Prop_A5_6  | .....      | .....      | .....      | .....C     | .....      |
| Prop_A8_2  | .....C     | .....      | .....      | .....      | .....      |
| Prop_A8_3  | .....      | .....      | .....      | .....C     | .....      |
| Prop_A8_4  | .....      | .....      | .....      | .....C     | .....      |
| Prop_A9_1  | .....C     | .....      | .....      | .....      | .....      |
| Prop_A9_2  | .....C     | .....      | .....      | .....      | .....      |
| Prop_A9_3  | .....C     | .....      | .....      | .....      | .....      |
| Prop_A9_4  | .....C     | .....      | .....      | .....      | .....      |
| Prop_A10_1 | .....C     | .....      | .....      | .....      | .....      |
| Prop_A10_3 | .....      | .....      | .....      | .....C     | .....      |
| Prop_A10_5 | .....C     | .....      | .....      | .....      | .....      |
| Prop_A10_2 | .....C     | .....      | .....      | .....      | .....      |
| Prop_A10_4 | .....C     | .....      | .....      | .....      | .....      |

|            | 910        | 920              |
|------------|------------|------------------|
| Kisumu     | .... ....  | ....             |
|            | CGCTGCATCT | GCTGTCCGCC CTATC |
| Ben_A1_3   | .....      | .....            |
| Ben_A1_4   | .....      | .....            |
| Ben_A1_5   | .....      | .....            |
| Ben_A4_1   | .....      | .....            |
| Ben_A4_3   | .....      | .....            |
| Ben_A4_5   | .....      | .....            |
| Ben_A7_1   | .....      | .....            |
| Ben_A7_2   | .....      | .....            |
| Ben_A7_3   | .....      | .....            |
| Ben_A7_5   | .....      | .....            |
| Ben_A7_6   | .....      | .....            |
| Prop_A5_1  | .....      | .....            |
| Prop_A5_4  | .....      | .....            |
| Prop_A5_6  | .....      | .....            |
| Prop_A8_2  | .....      | .....            |
| Prop_A8_3  | .....      | .....            |
| Prop_A8_4  | .....      | .....            |
| Prop_A9_1  | .....      | .....            |
| Prop_A9_2  | .....      | .....            |
| Prop_A9_3  | .....      | .....            |
| Prop_A9_4  | .....      | .....            |
| Prop_A10_1 | .....      | .....            |
| Prop_A10_3 | .....      | .....            |

Prop\_A10\_5 .....  
Prop\_A10\_2 .....  
Prop\_A10\_4 .....
